# Supplementary material
Source: MDPI journal article supplement (https://www.mdpi.com/search?q=molecules-26-02145)
Supplement: s001 [file molecules-26-02145-s001.pdf]

# Synthesis, antiprotozoal activity, and cheminformatic analysis of 2-phenyl-2*H*-indazole derivatives

Karen Rodríguez-Villar <sup>1</sup>, Lilián Yépez-Mulia <sup>2</sup>, Miguel Cortés-Gines <sup>3</sup>, Jacobo David Aguilera-Perdomo <sup>3</sup>, Edgar A. Quintana-Salazar <sup>3</sup>, Kevin Samael Olascoaga Del Angel <sup>4</sup>, Francisco Cortés-Benítez <sup>3</sup>, Juan Francisco Palacios-Espinosa <sup>3</sup>, Olivia Soria-Arteche <sup>3</sup> and Jaime Pérez-Villanueva <sup>3,\*</sup>

<sup>1</sup> Doctorado en Ciencias Biológicas y de la Salud, Universidad Autónoma Metropolitana (UAM), Ciudad de México 04960, Mexico; qkarenrodv@hotmail.com

<sup>2</sup> Unidad de Investigación Médica en Enfermedades Infecciosas y Parasitarias, UMAE Hospital de Pediatría, Centro Médico Siglo XXI, Instituto Mexicano del Seguro Social, Ciudad de México 06720, Mexico; lilianyopez@yahoo.com

<sup>3</sup> Departamento de Sistemas Biológicos, División de Ciencias Biológicas y de la Salud, Universidad Autónoma Metropolitana-Xochimilco (UAM-X), Ciudad de México 04960, Mexico; mcortes@pharmometrica.com.mx (M.C.-G.); jacoboaaguilera.96@gmail.com (J.D.A.-P); edgarqsl2811@gmail.com (E.A.Q.-S); jcortesb@correo.xoc.uam.mx (F.C.-B); jpalacios@correo.xoc.uam.mx (J.F.P.-E.); soriao@correo.xoc.uam.mx (O.S.-A.);

<sup>4</sup> Doctorado en Biología experimental, Universidad Autónoma Metropolitana (UAM), Ciudad de México 04960, Mexico; olaskuaga@gmail.com

\* Correspondence: jpvillanueva@correo.xoc.uam.mx; Tel.: +525 54 83 72 59; fax: +525 55 94 79 29.

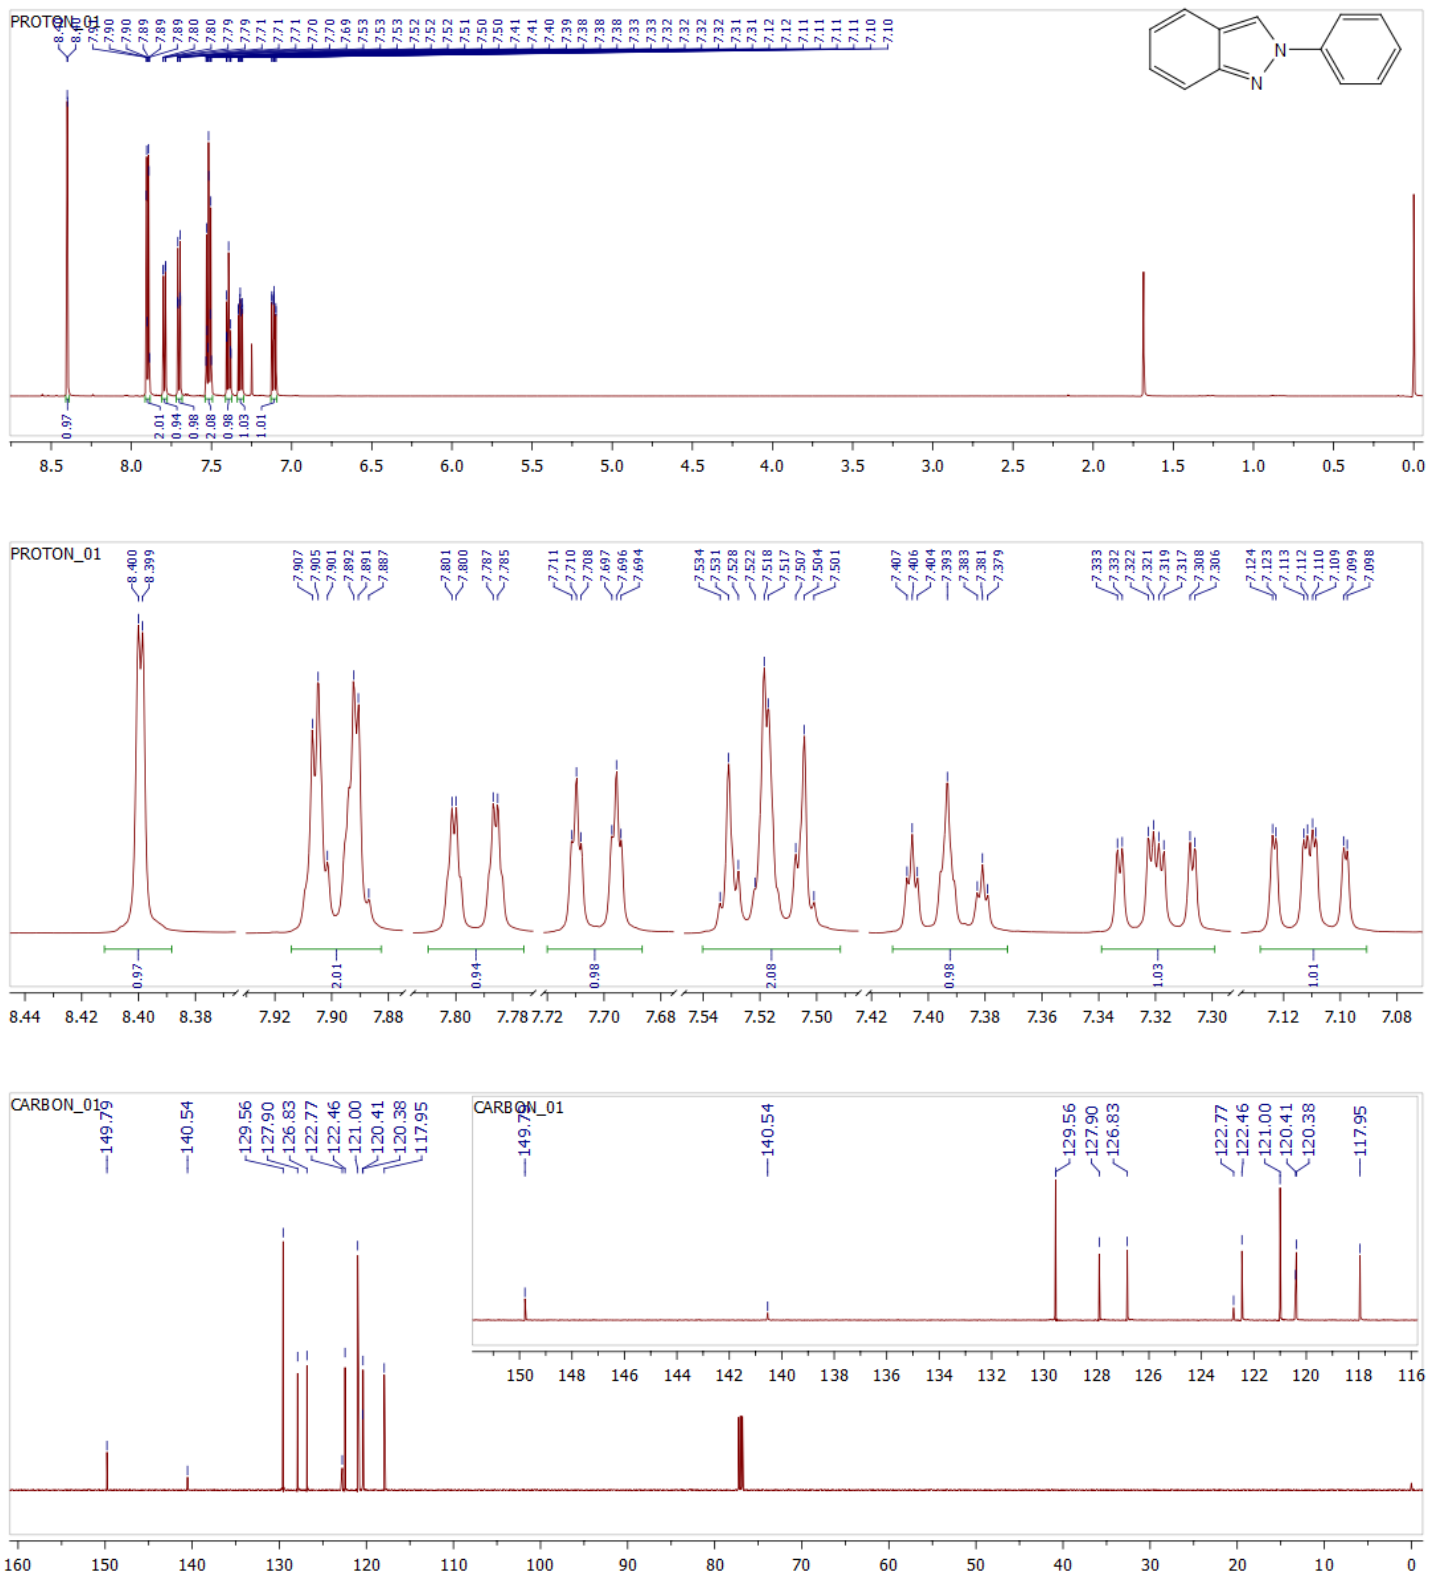

**Figure S1.** <sup>1</sup>H NMR (600 MHz, CDCl<sub>3</sub>) and <sup>13</sup>C NMR (151 MHz, CDCl<sub>3</sub>) for 2-phenyl-2H-indazole (**1**).

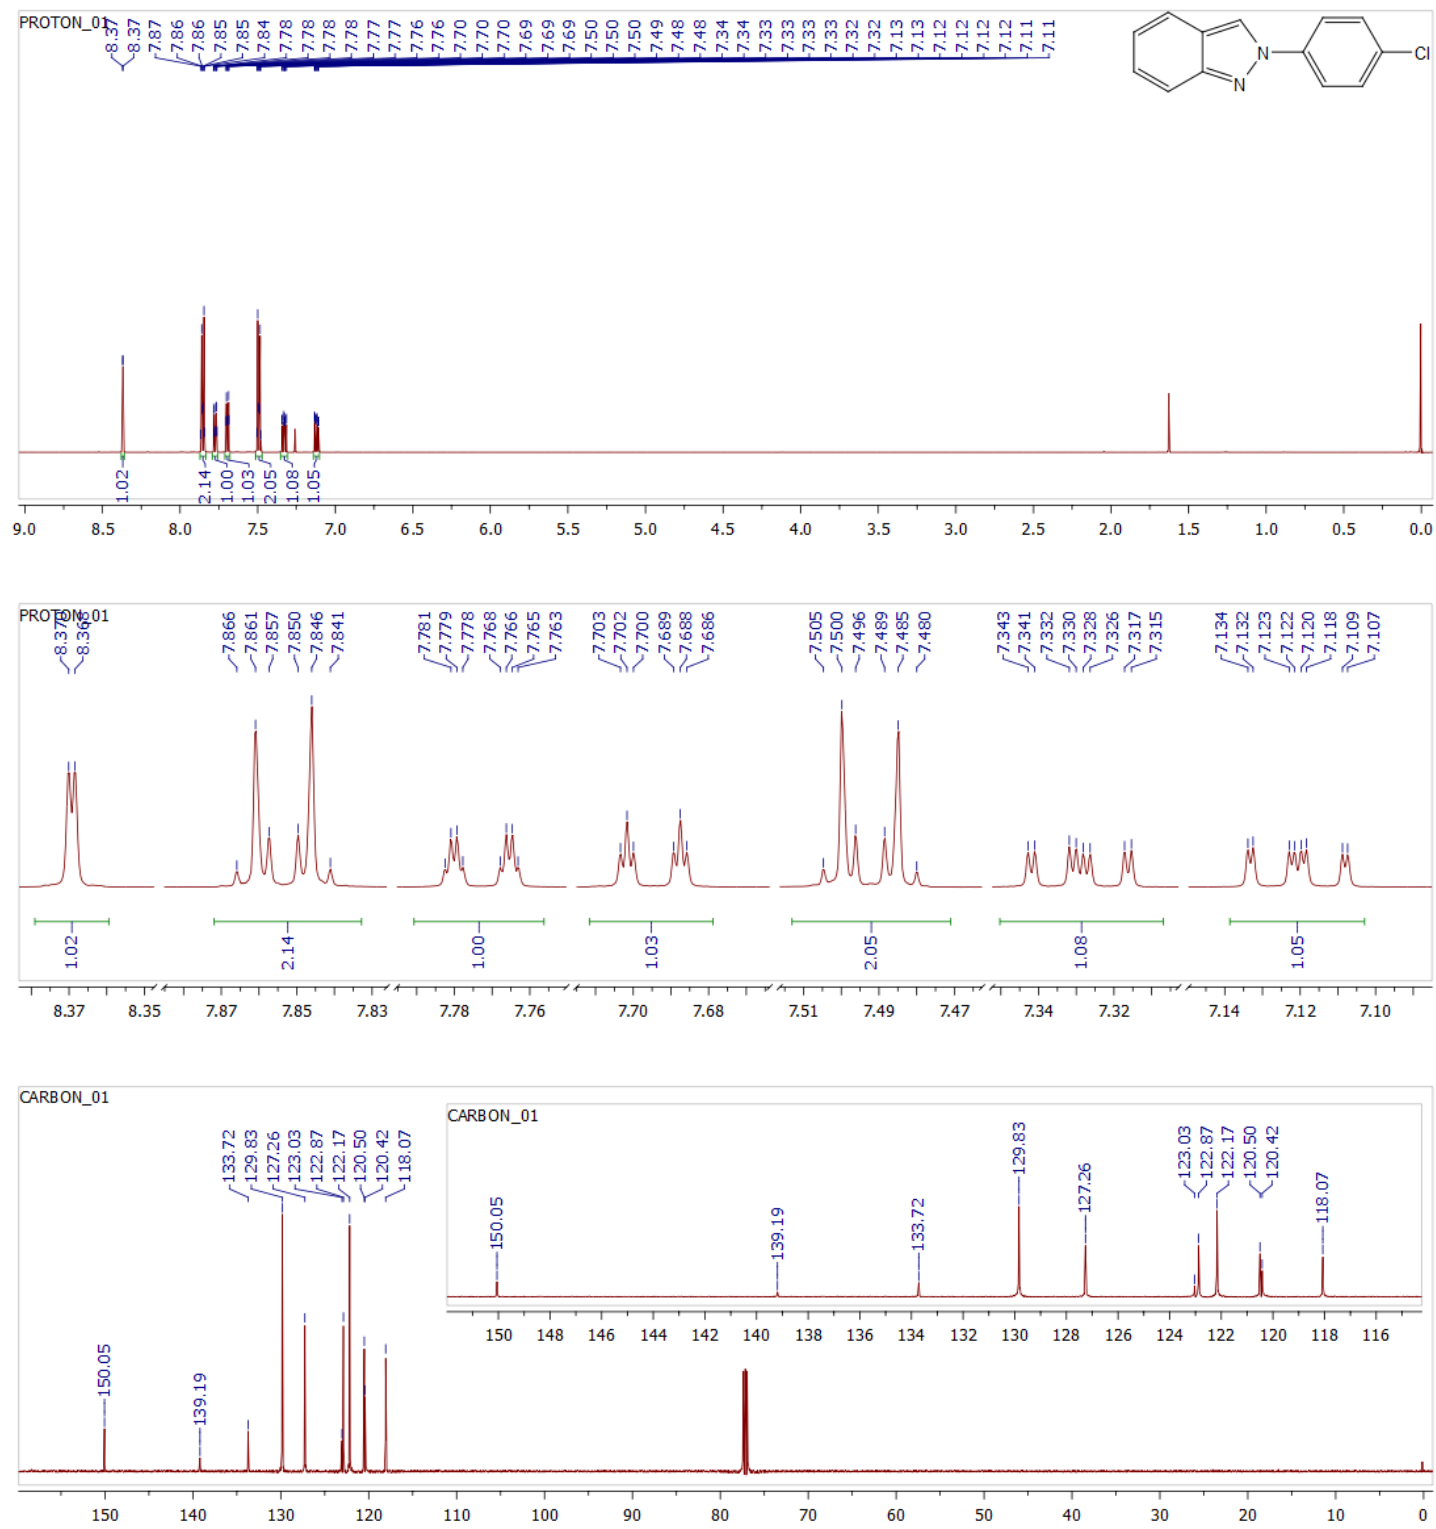

**Figure S2.** <sup>1</sup>H NMR (600 MHz, CDCl<sub>3</sub>) and <sup>13</sup>C NMR (151 MHz, CDCl<sub>3</sub>) for 2-(4-chlorophenyl)-2H-indazole (2)

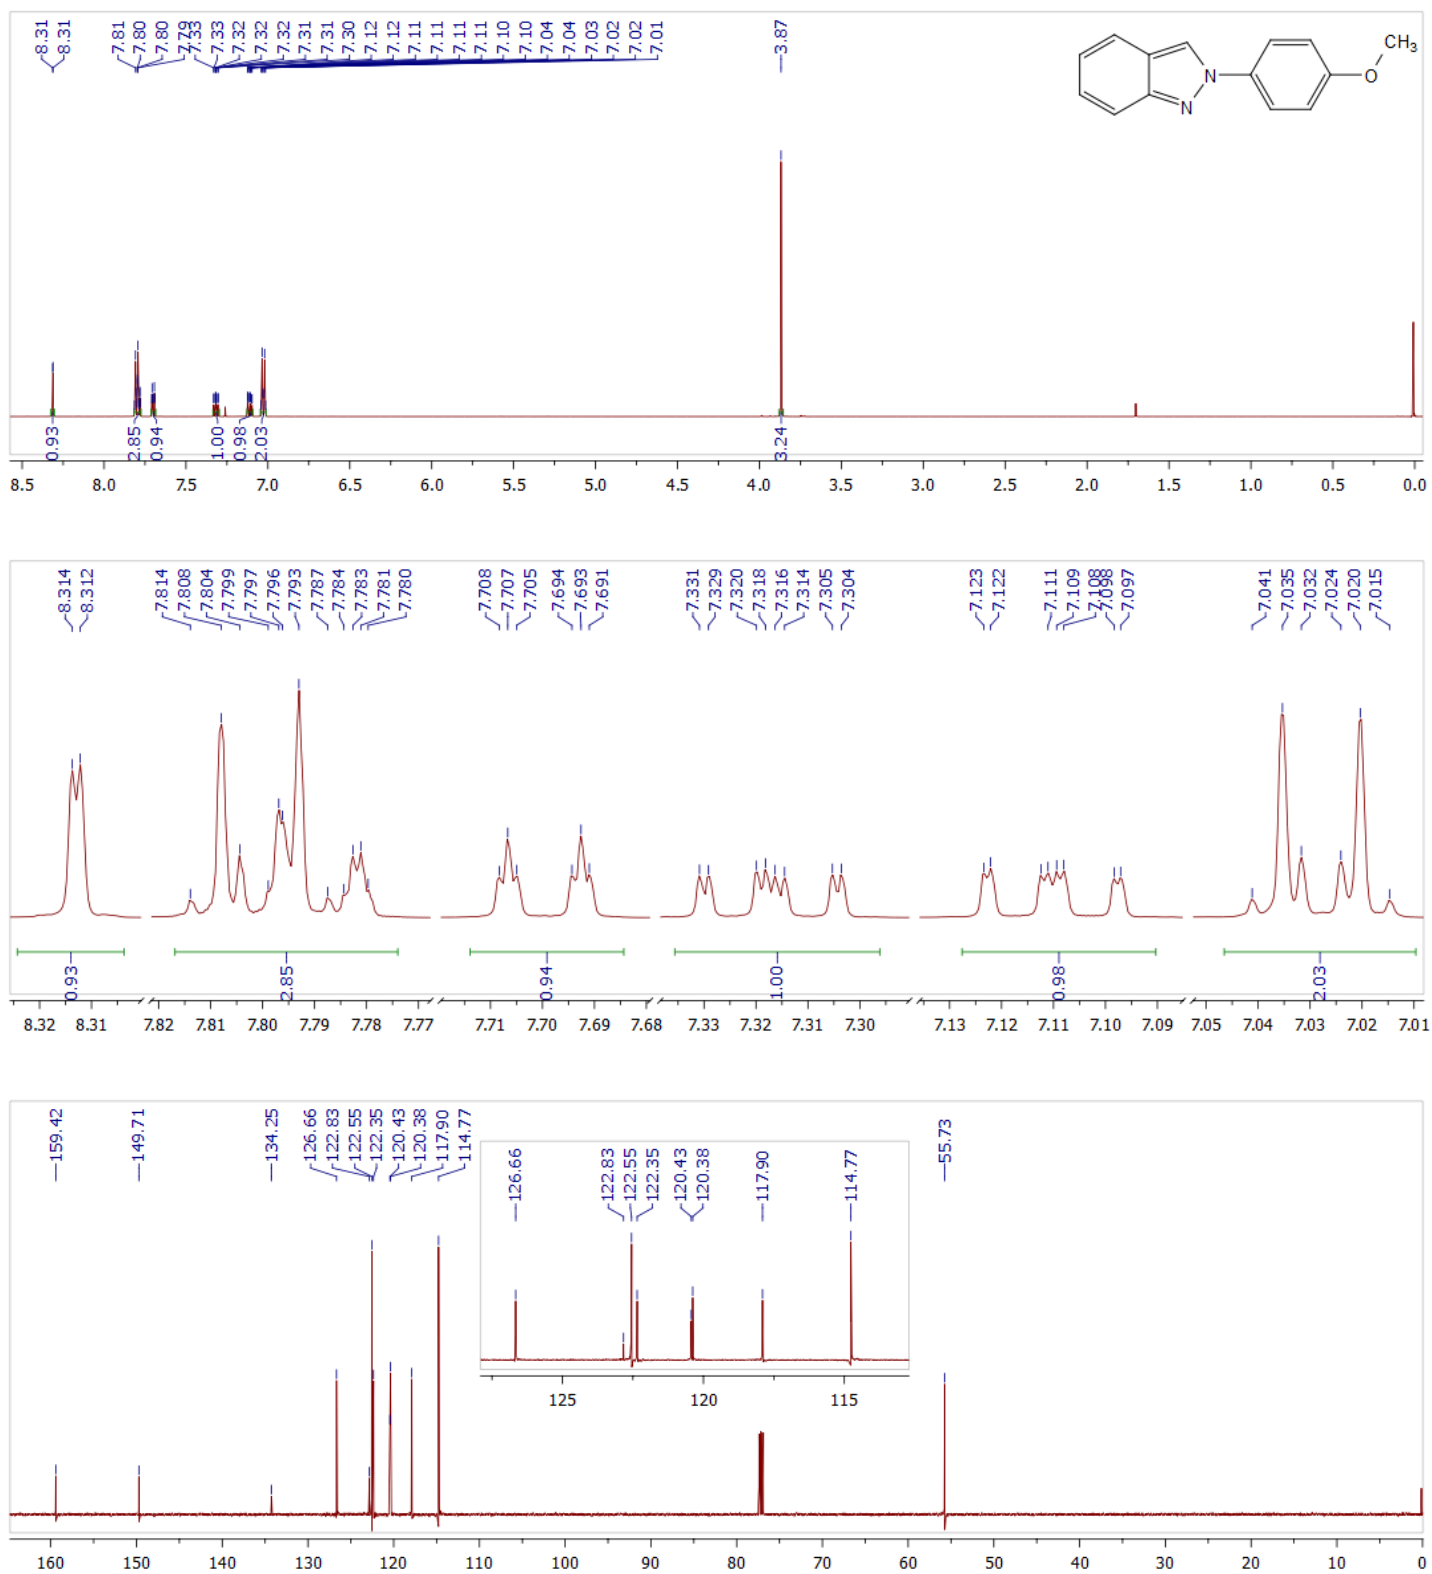

**Figure S3.** <sup>1</sup>H NMR (600 MHz, CDCl<sub>3</sub>) and <sup>13</sup>C NMR (151 MHz, CDCl<sub>3</sub>) for 2-(4-methoxyphenyl)-2H-indazole (**3**).

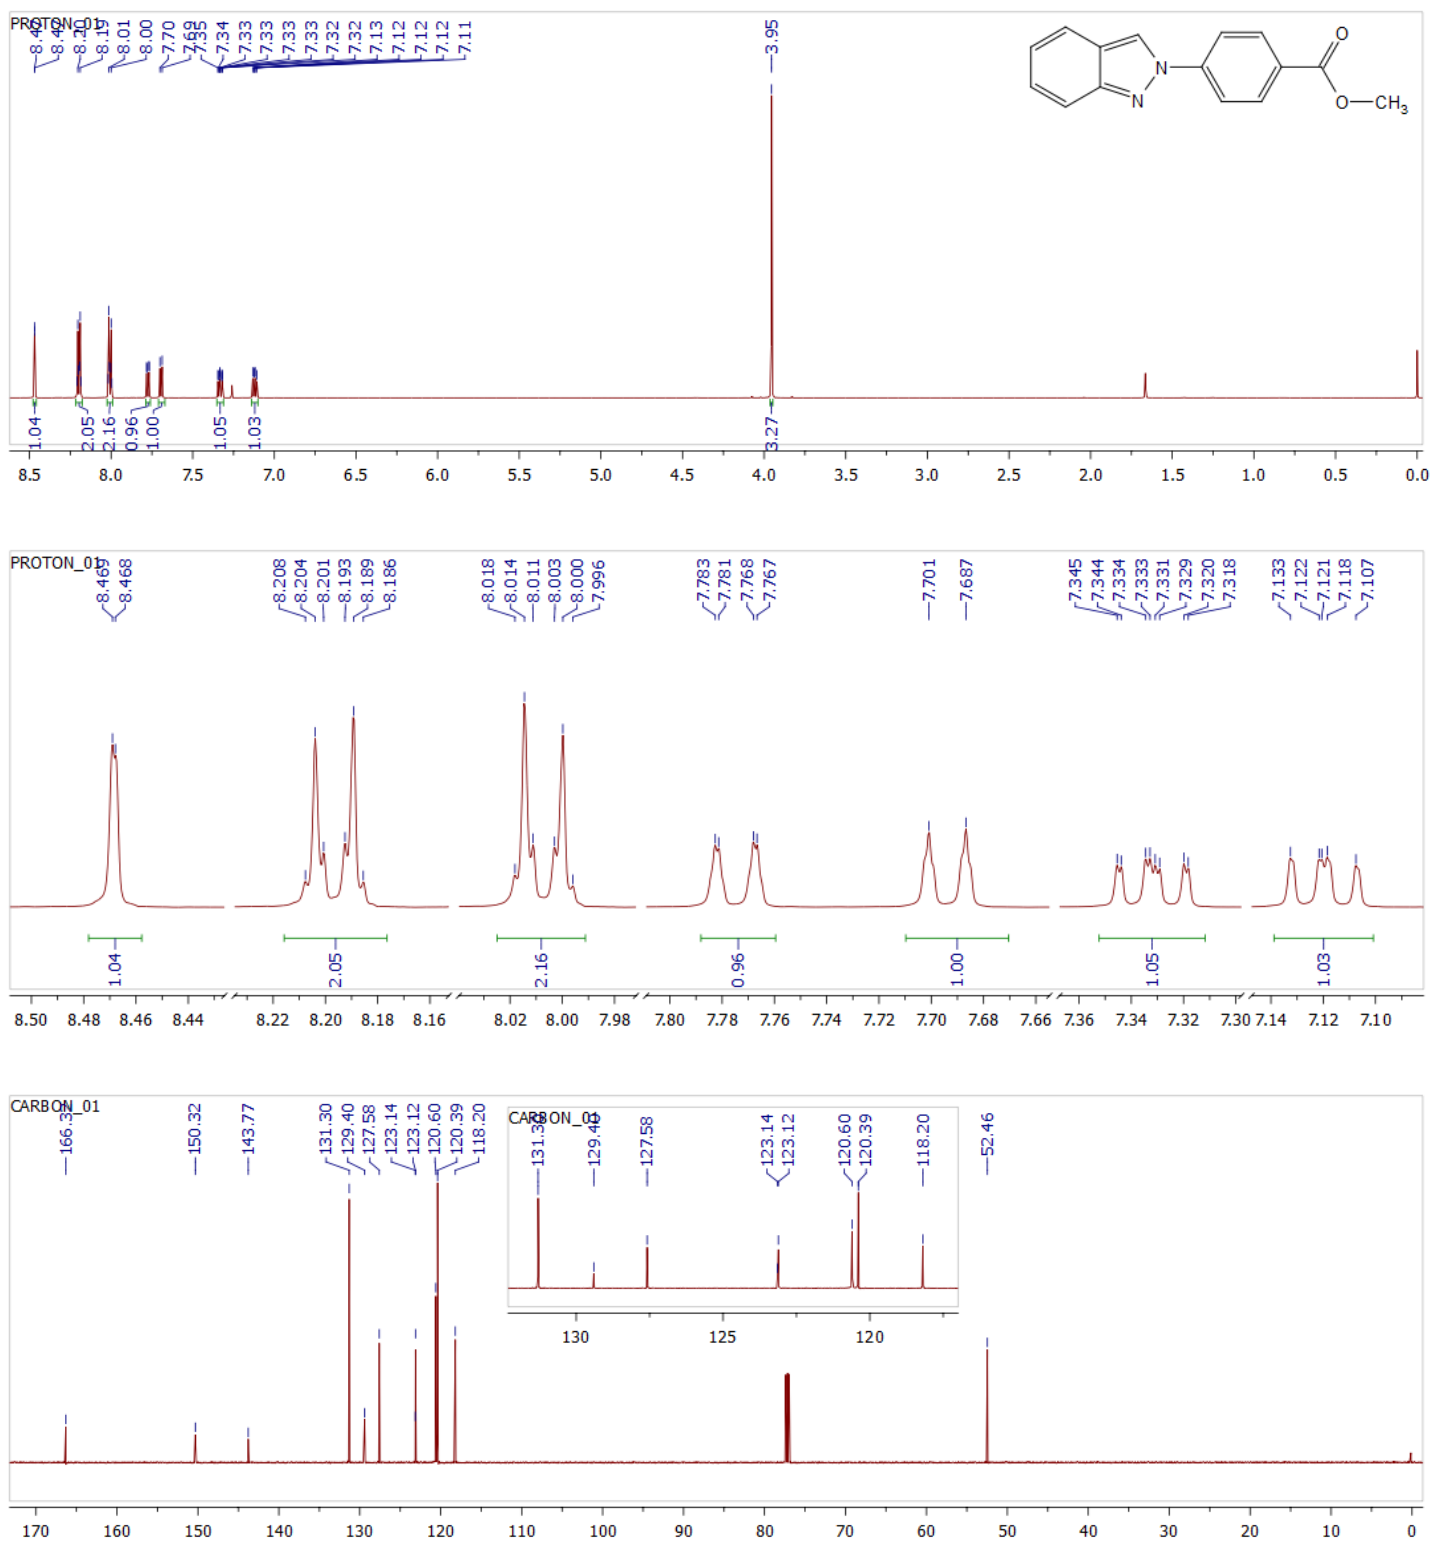

**Figure S4.** <sup>1</sup>H NMR (600 MHz, CDCl<sub>3</sub>) and <sup>13</sup>C NMR (151 MHz, CDCl<sub>3</sub>) for methyl 4-(2*H*-indazol-2-yl)benzoate (**4**).



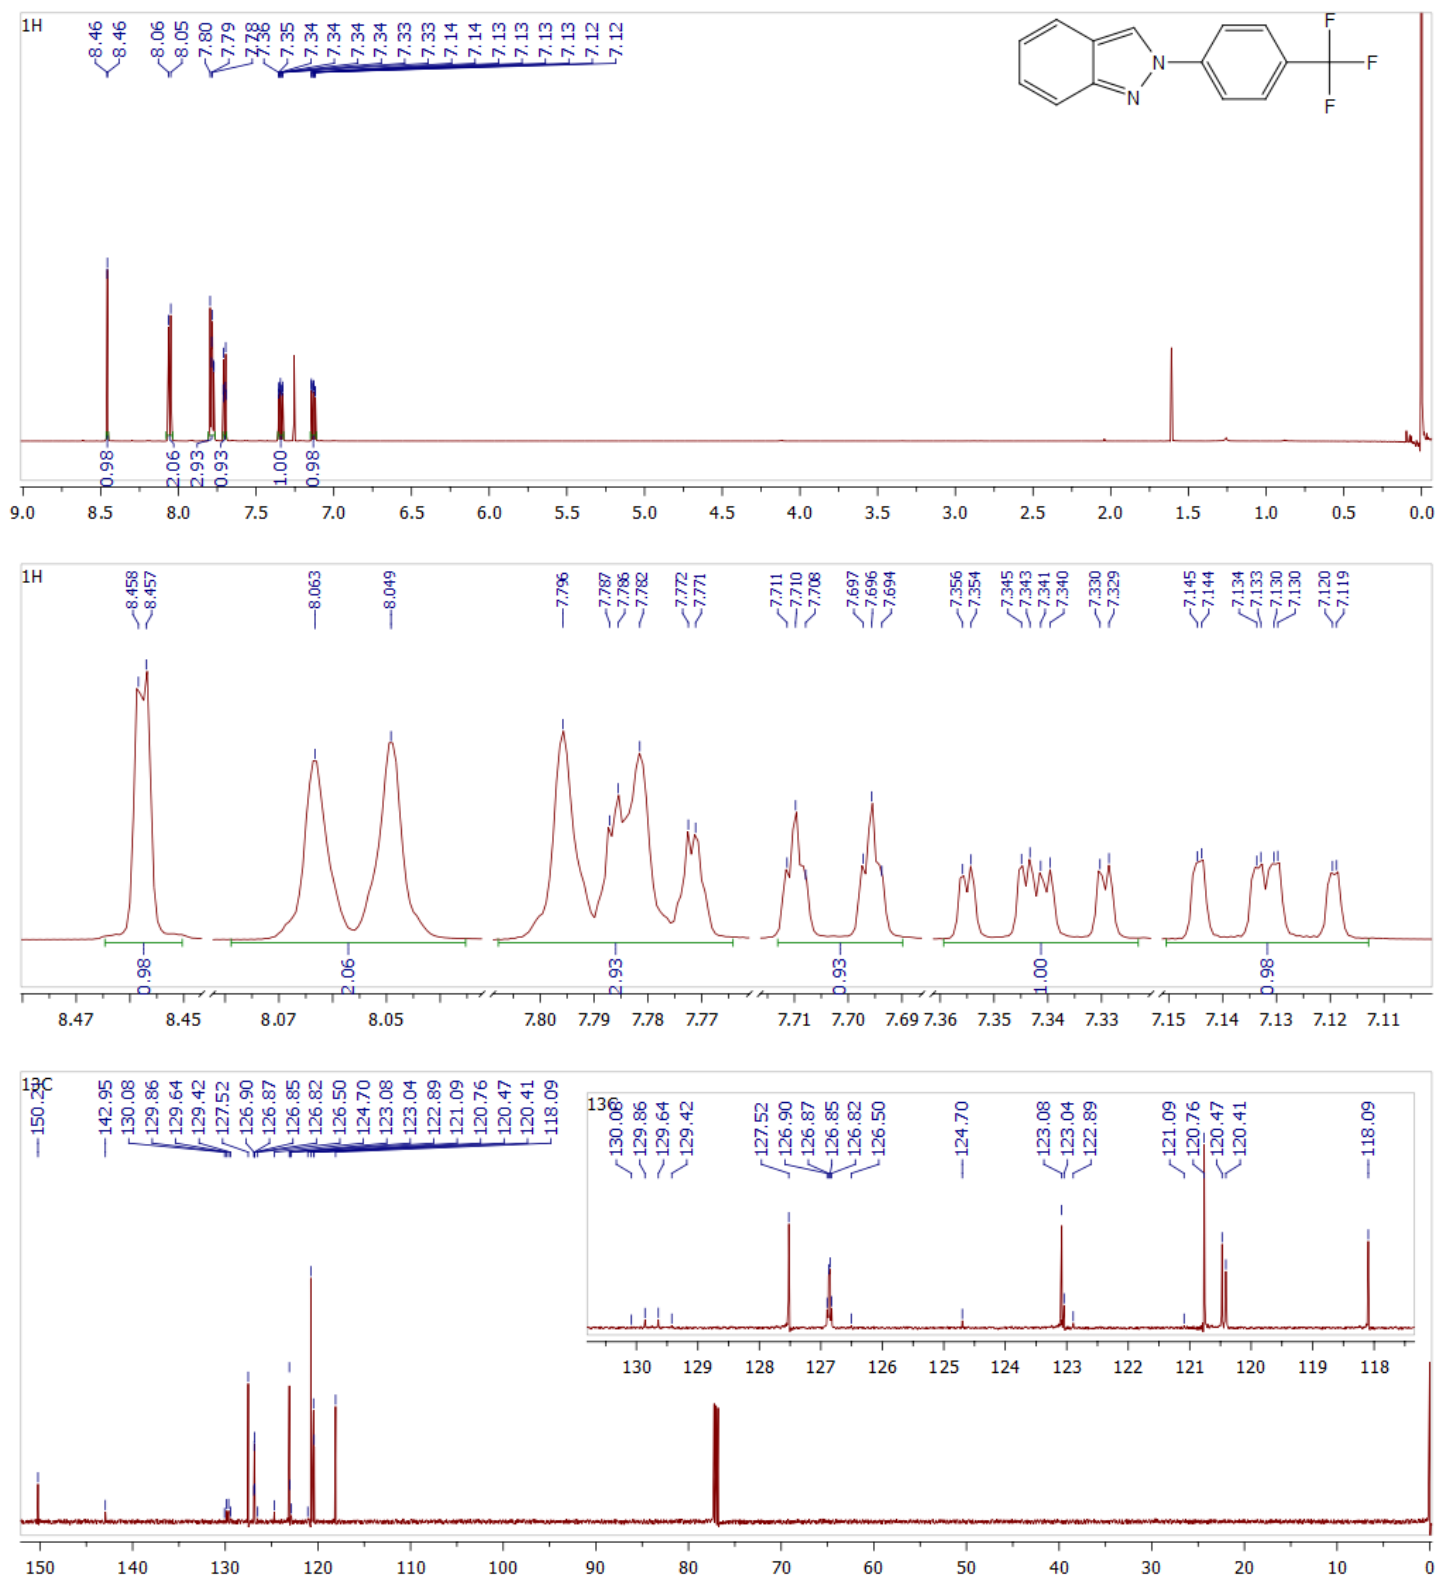

**Figure S6.** <sup>1</sup>H NMR (600 MHz, CDCl<sub>3</sub>) and <sup>13</sup>C NMR (151 MHz, CDCl<sub>3</sub>) for 2-[4-(trifluoromethyl)phenyl]-2H-indazole (6).

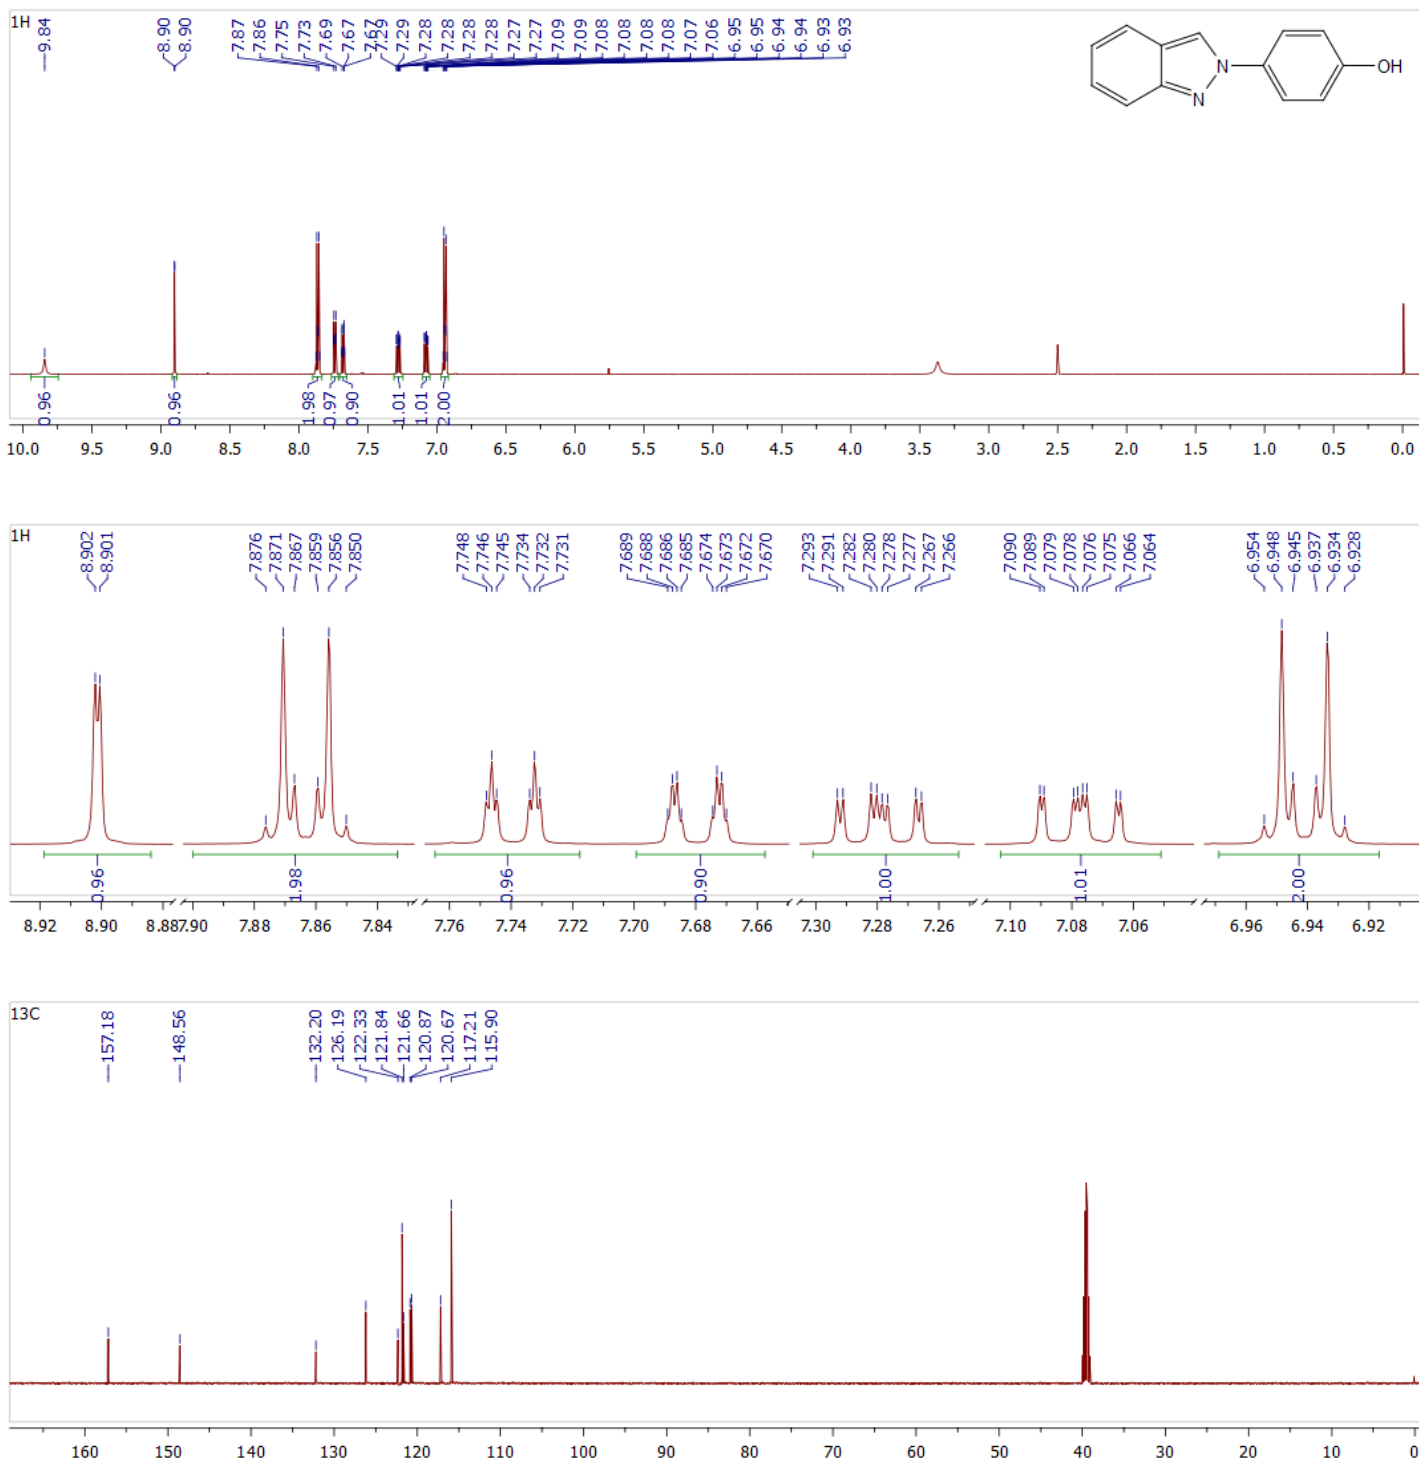

**Figure S7.** <sup>1</sup>H NMR (600 MHz, DMSO-*d*<sub>6</sub>) and <sup>13</sup>C NMR (151 MHz, DMSO-*d*<sub>6</sub>) for 4-(2*H*-indazol-2-yl)phenol (**7**).



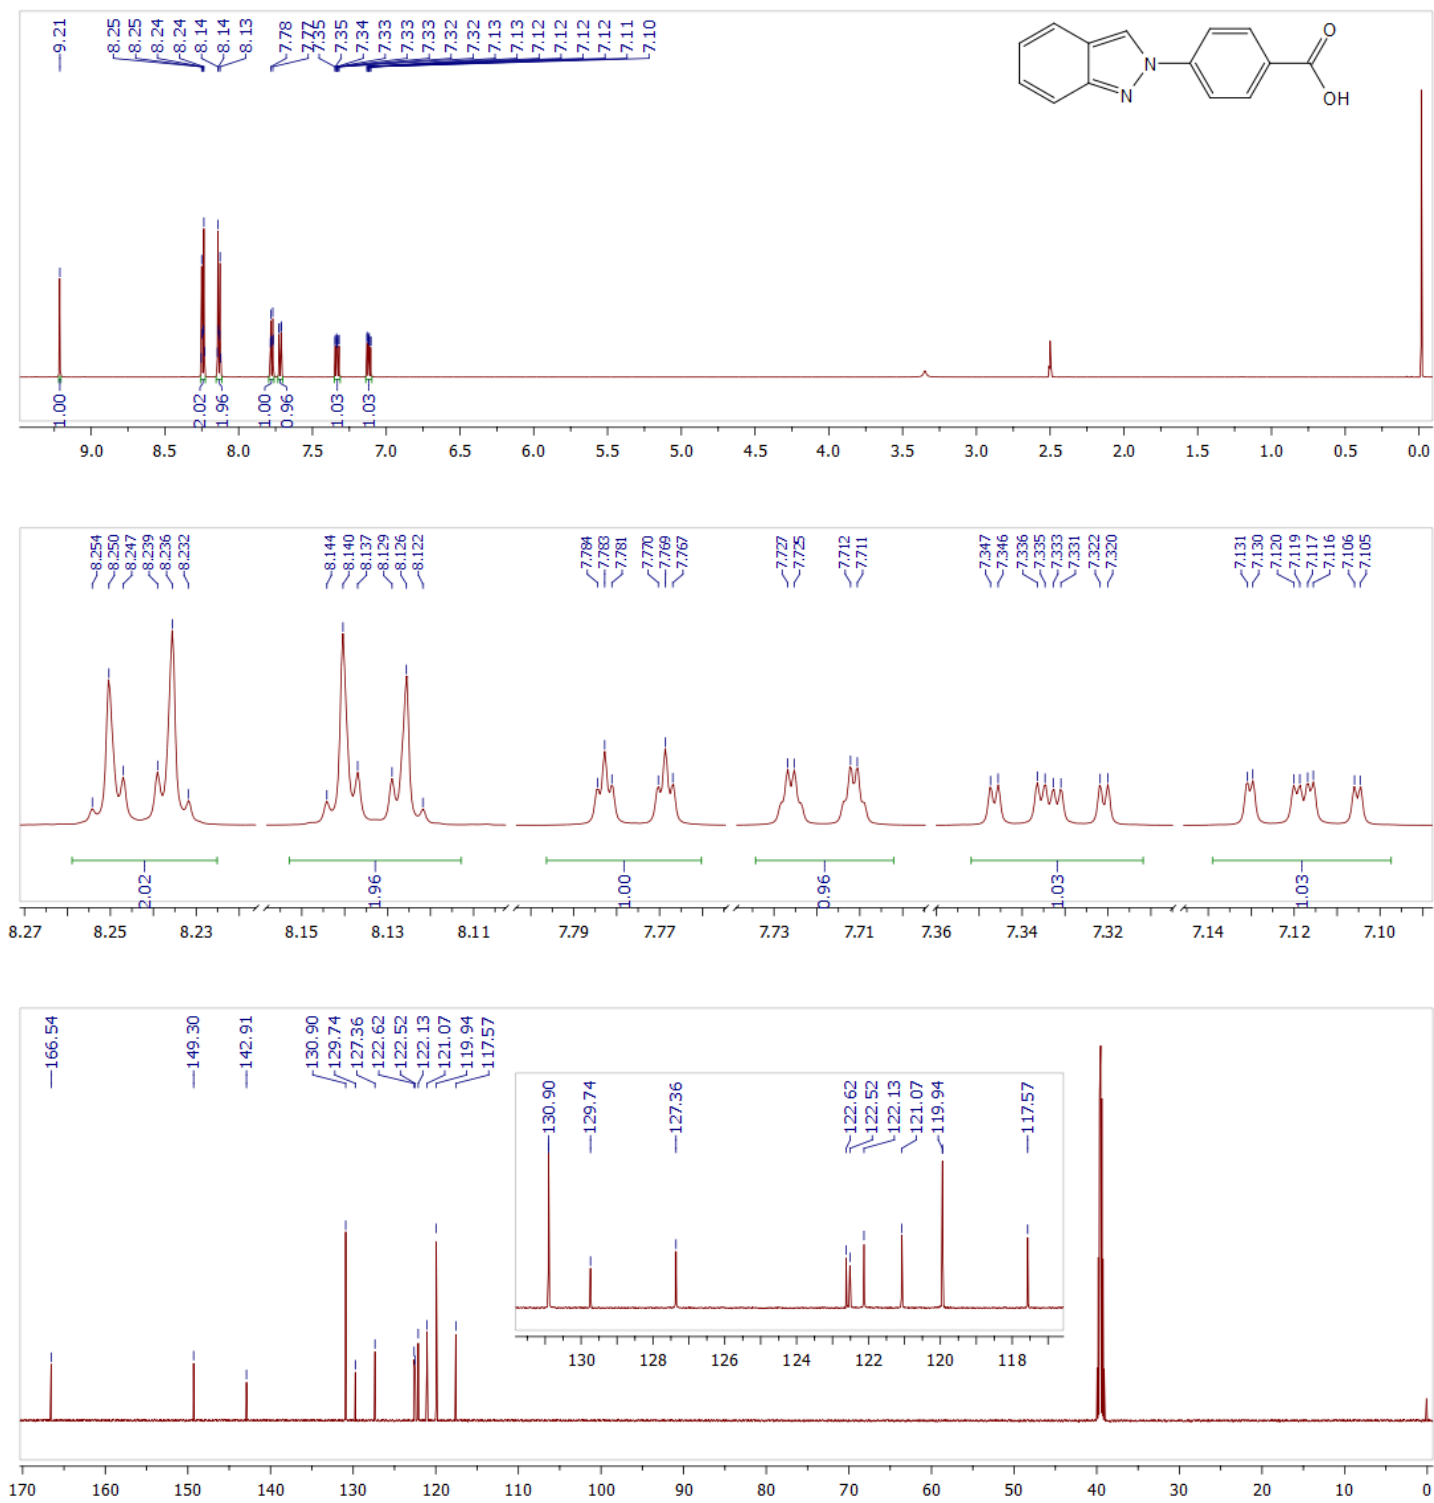

**Figure S8.** <sup>1</sup>H NMR (600 MHz, DMSO-*d*<sub>6</sub>) and <sup>13</sup>C NMR (151 MHz, DMSO-*d*<sub>6</sub>) for 4-(2*H*-indazol-2-yl) benzoic acid (**8**).



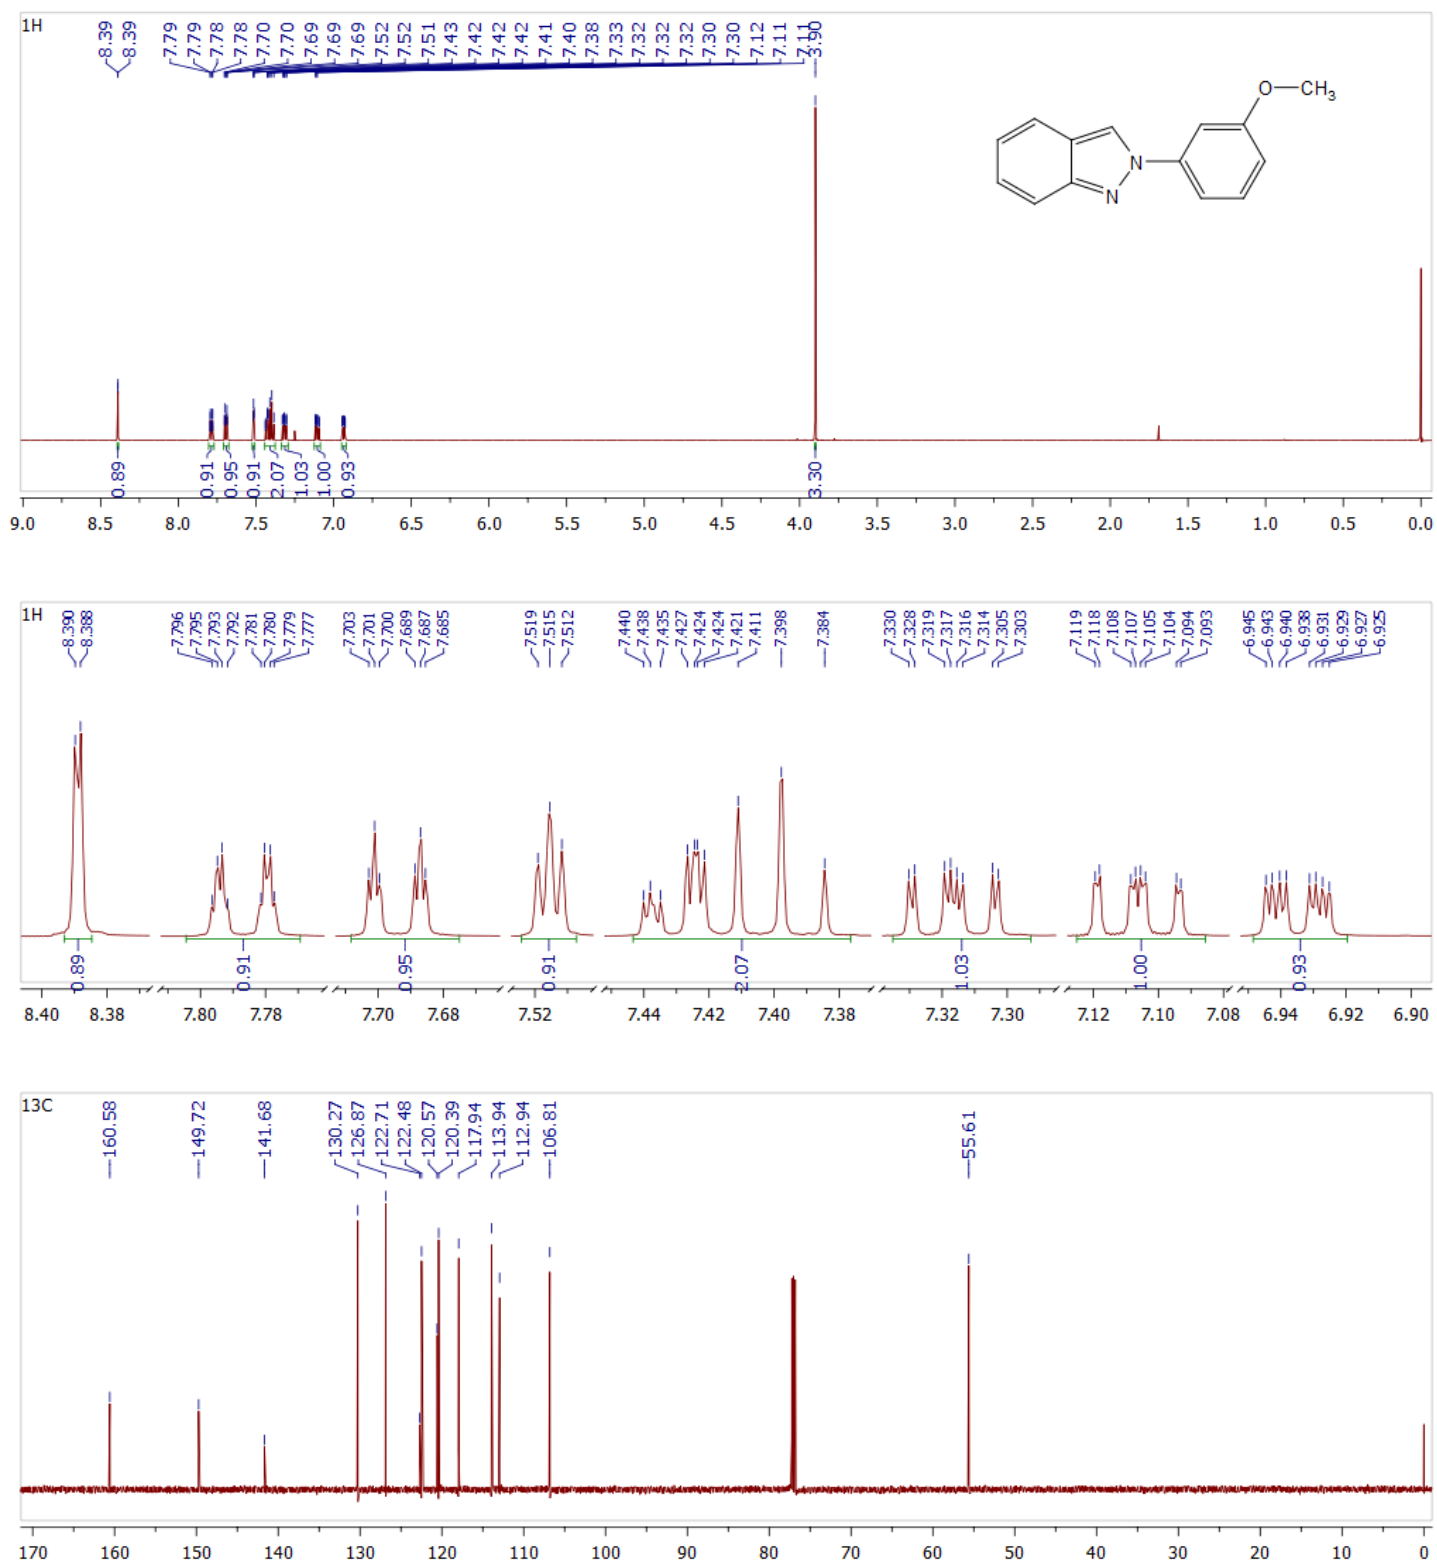

**Figure S10.** <sup>1</sup>H NMR (600 MHz, CDCl<sub>3</sub>) and <sup>13</sup>C NMR (151 MHz, CDCl<sub>3</sub>) for 2-(3-methoxyphenyl)-2H-indazole (**10**).

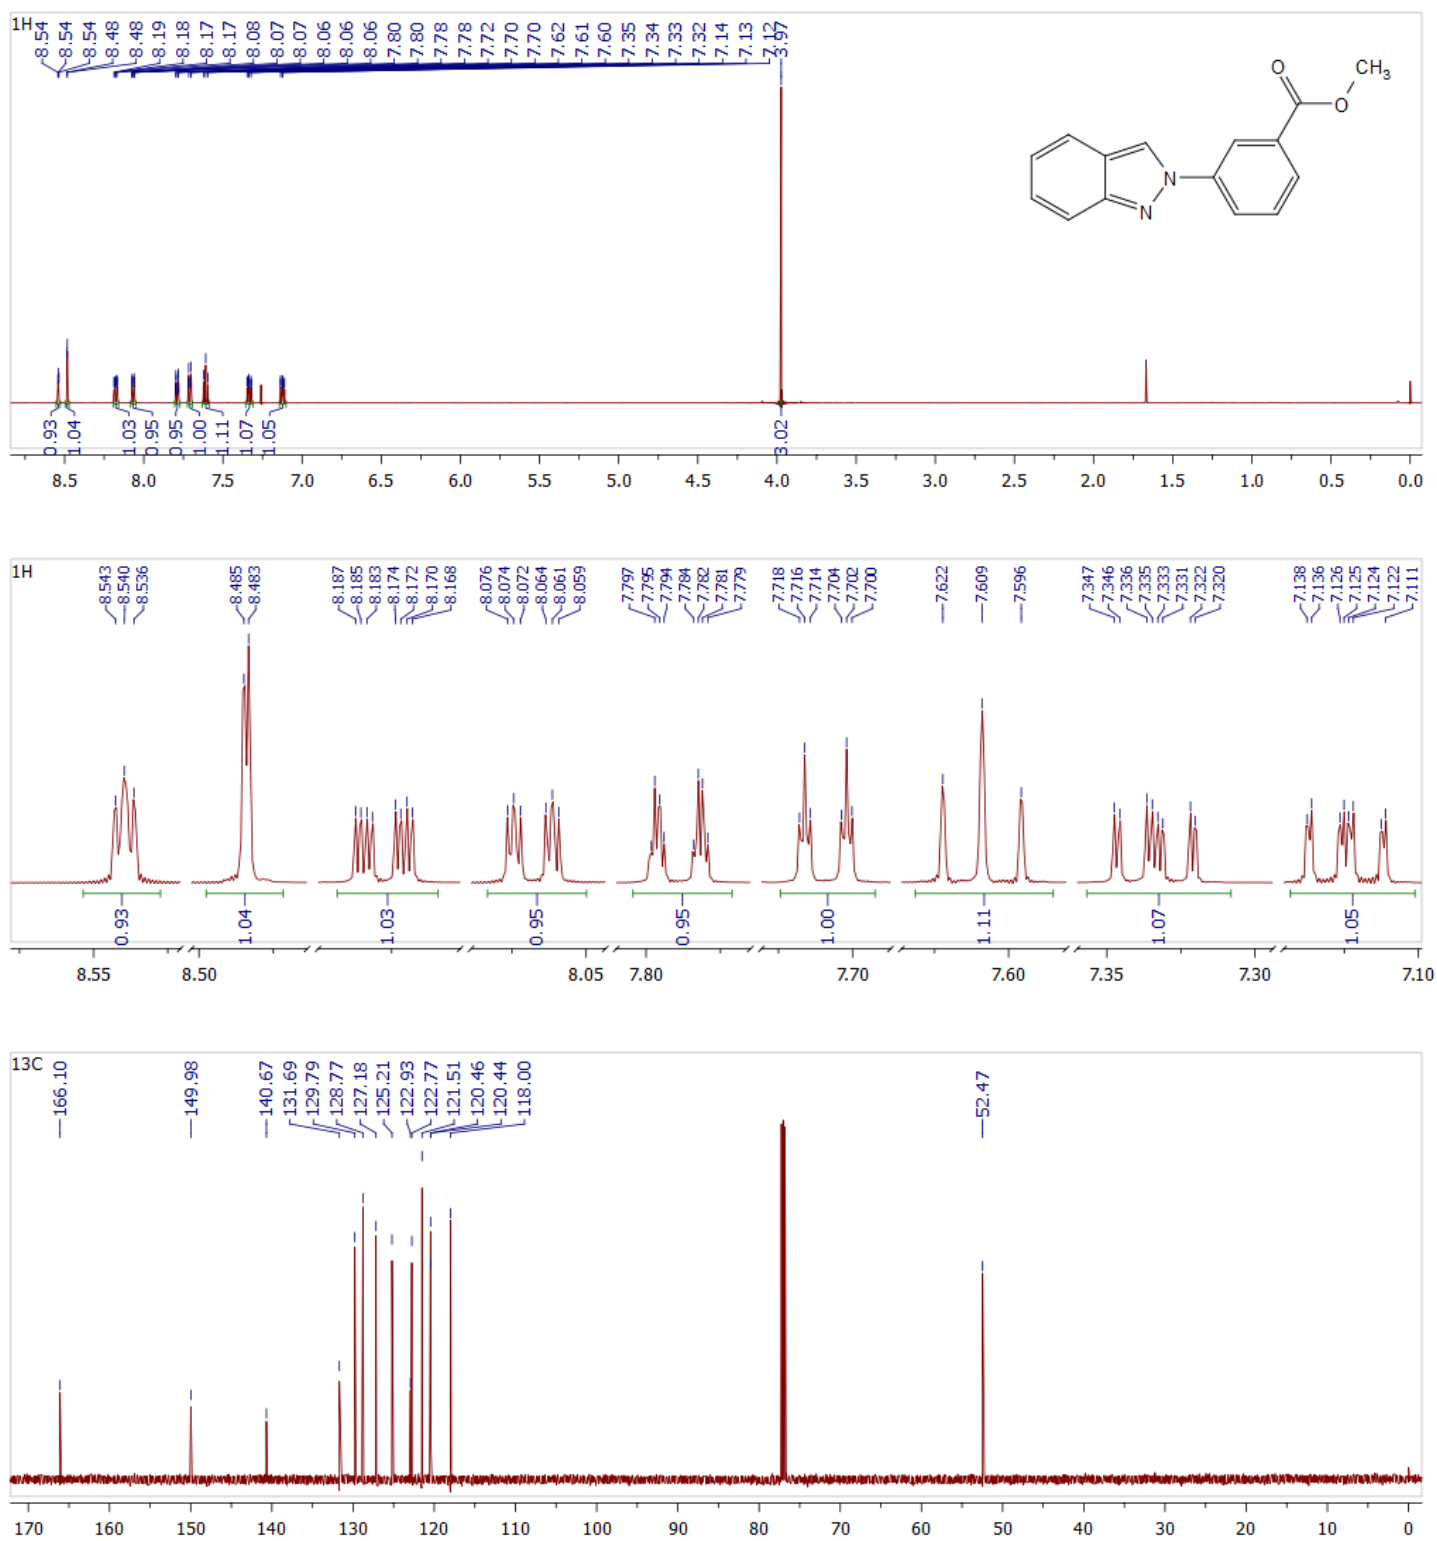

Figure S11. <sup>1</sup>H NMR (600 MHz, CDCl<sub>3</sub>) and <sup>13</sup>C NMR (151 MHz, CDCl<sub>3</sub>) for methyl 3-(2H-indazol-2-yl)benzoate (11).

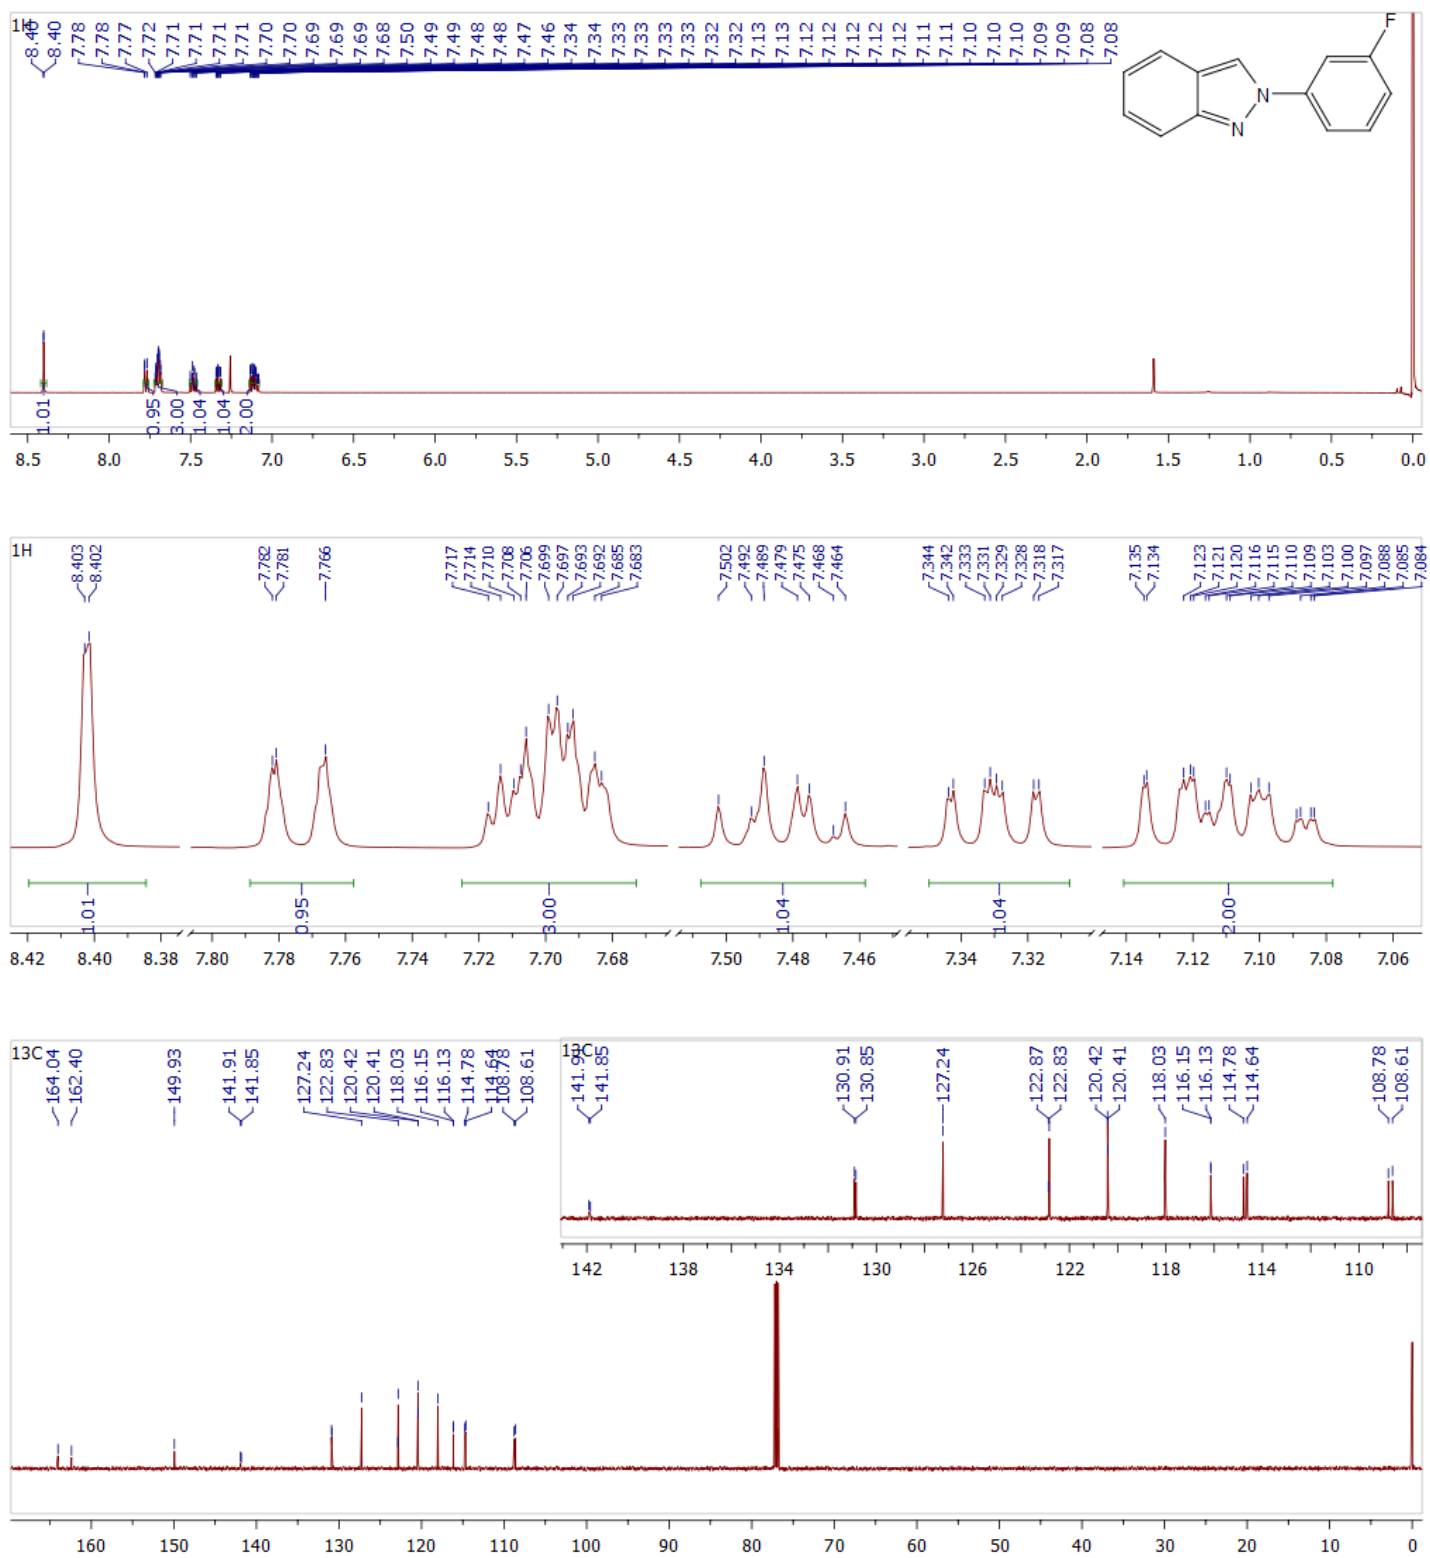

**Figure S12.** <sup>1</sup>H NMR (600 MHz, CDCl<sub>3</sub>) and <sup>13</sup>C NMR (151 MHz, CDCl<sub>3</sub>) for 2-(3-fluorophenyl)-2H-indazole (**12**).

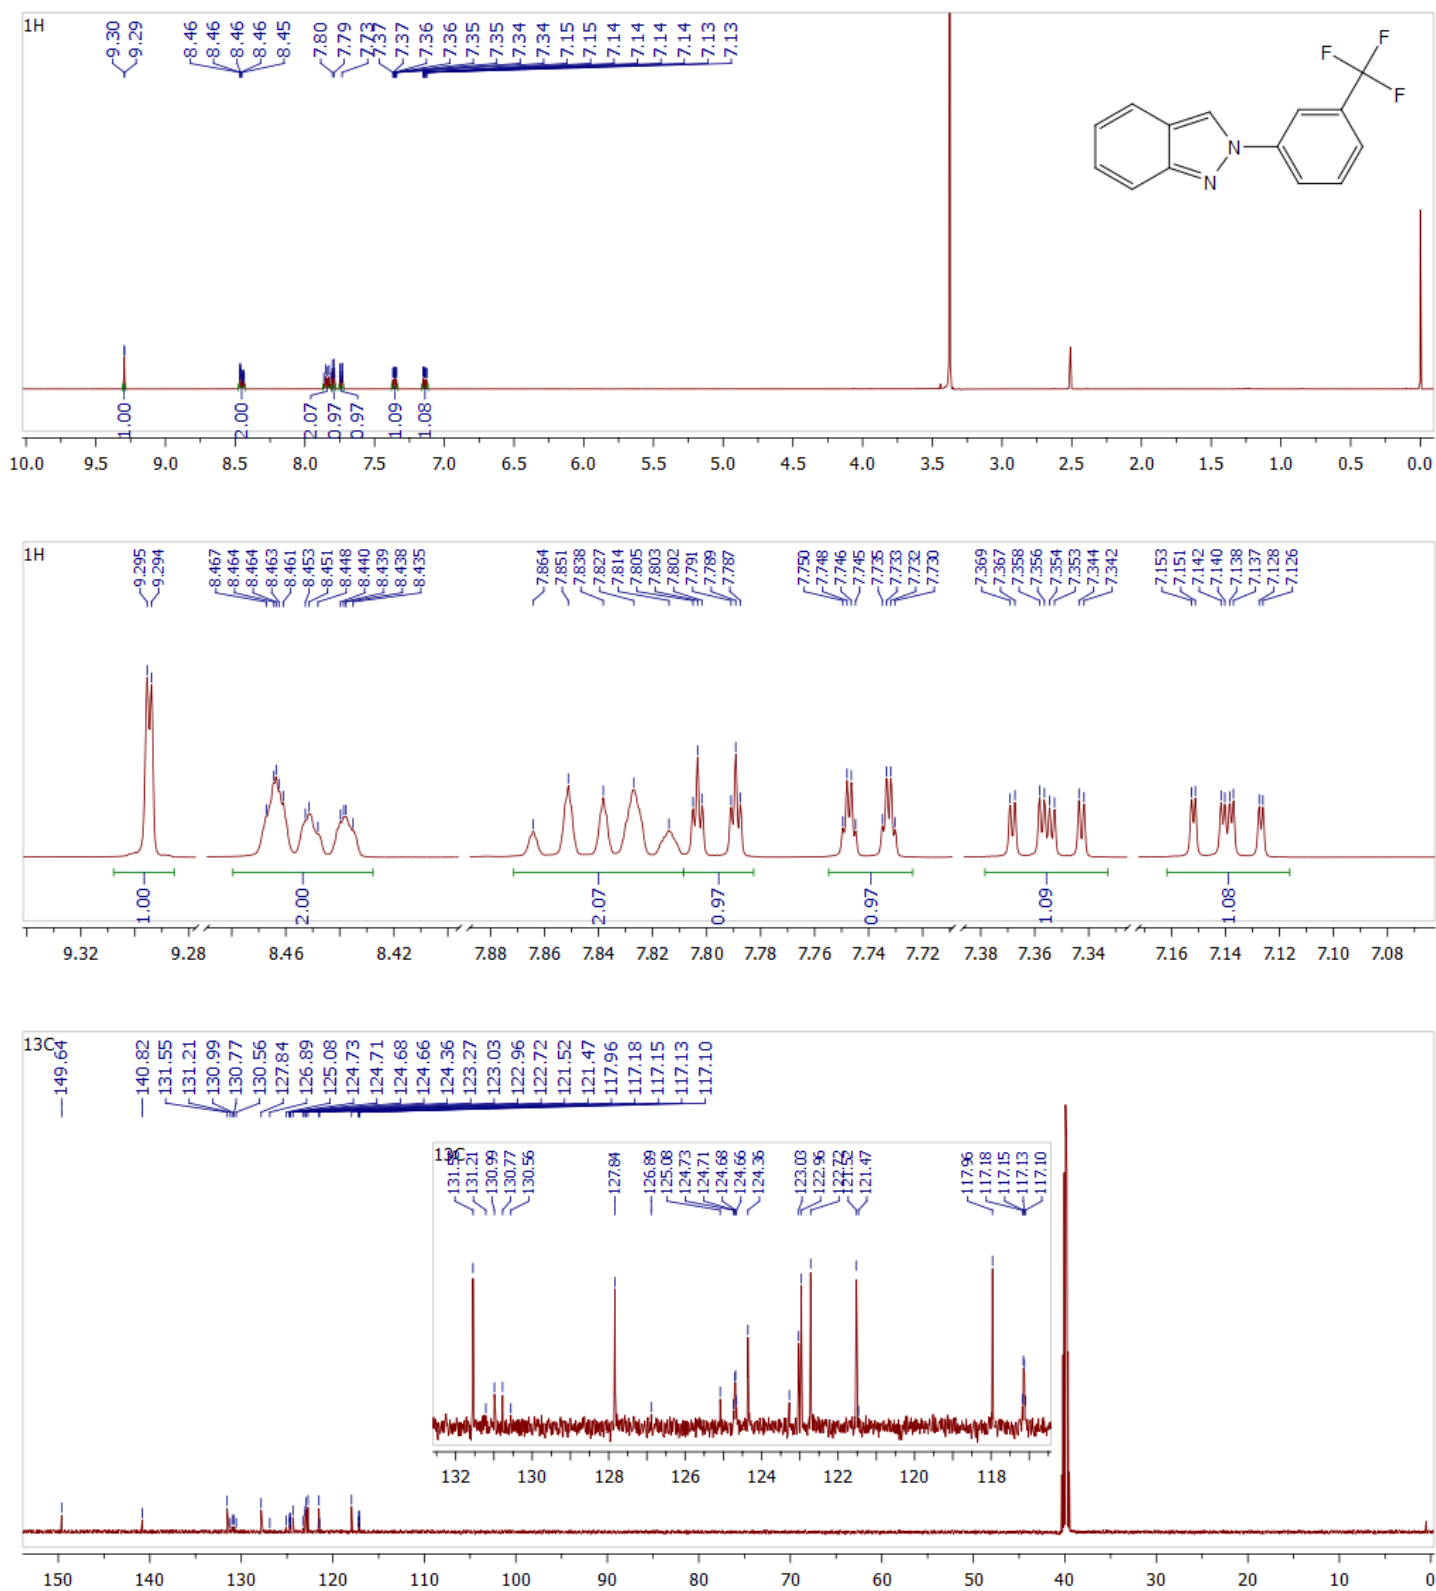

**Figure S13.** <sup>1</sup>H NMR (600 MHz, DMSO-*d*<sub>6</sub>) and <sup>13</sup>C NMR (151 MHz, DMSO-*d*<sub>6</sub>) for 2-[3-(trifluoromethyl)phenyl]-2H-indazole (**13**).

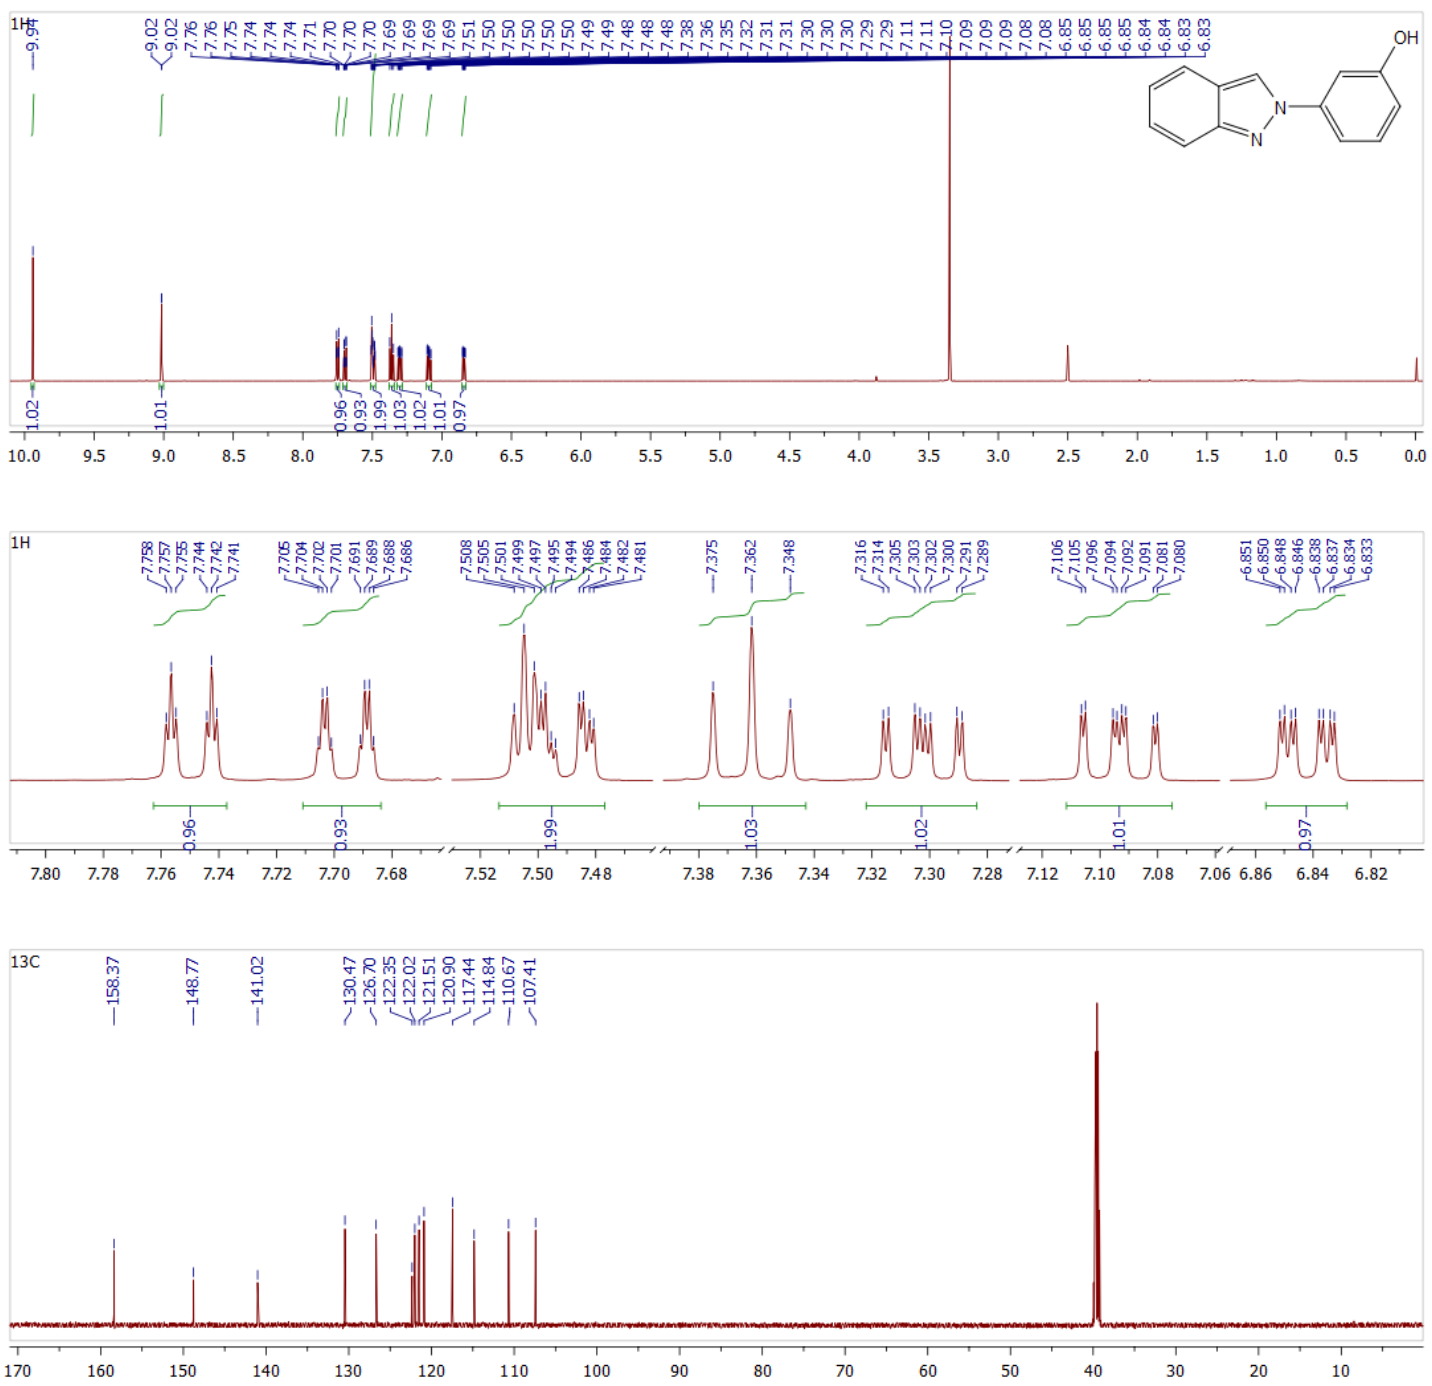

**Figure S14.** <sup>1</sup>H NMR (600 MHz, DMSO-*d*<sub>6</sub>) and <sup>13</sup>C NMR (151 MHz, DMSO-*d*<sub>6</sub>) for 3-(2H-indazol-2-yl)phenol (**14**).

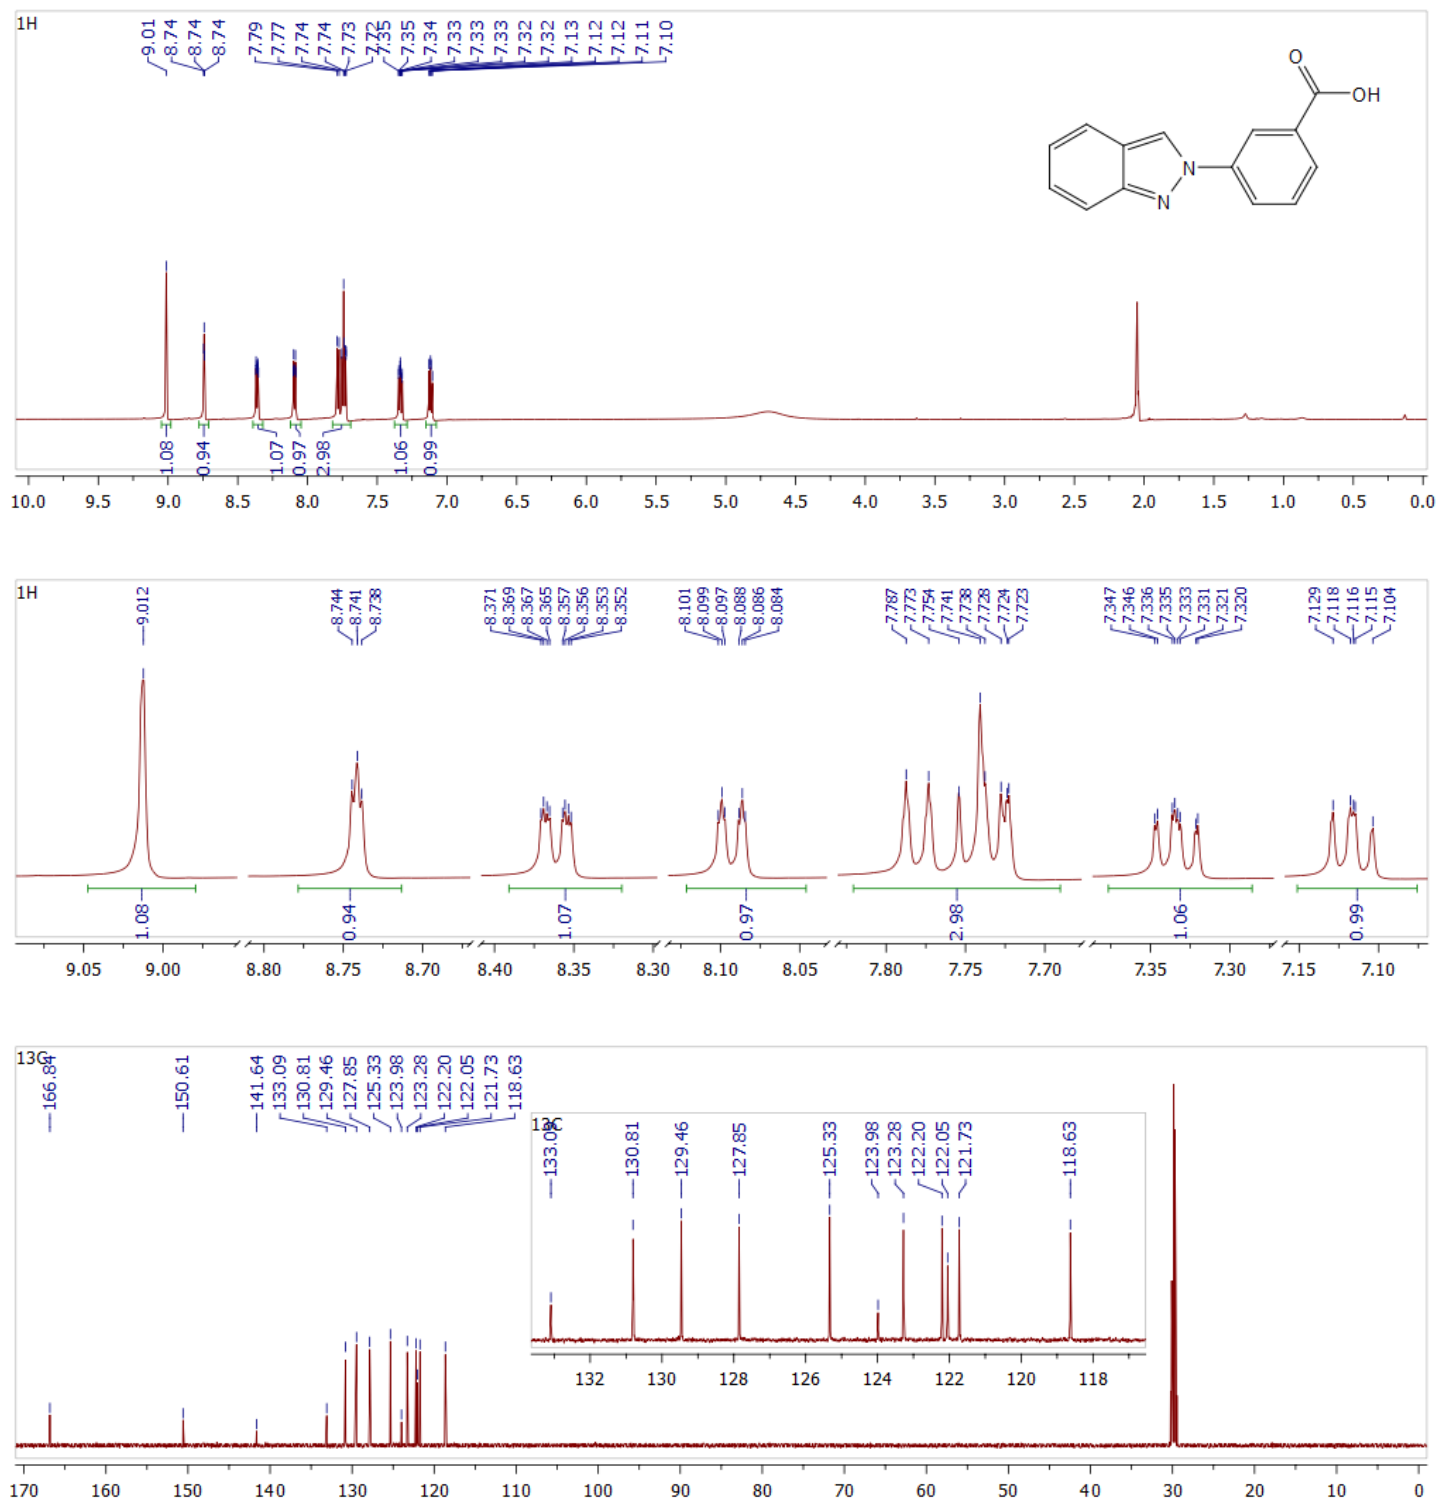

**Figure S15.** <sup>1</sup>H NMR (600 MHz, acetone-*d*<sub>6</sub>) and <sup>13</sup>C NMR (151 MHz, acetone-*d*<sub>6</sub>) for 3-(2*H*-indazol-2-yl)benzoic acid (15).



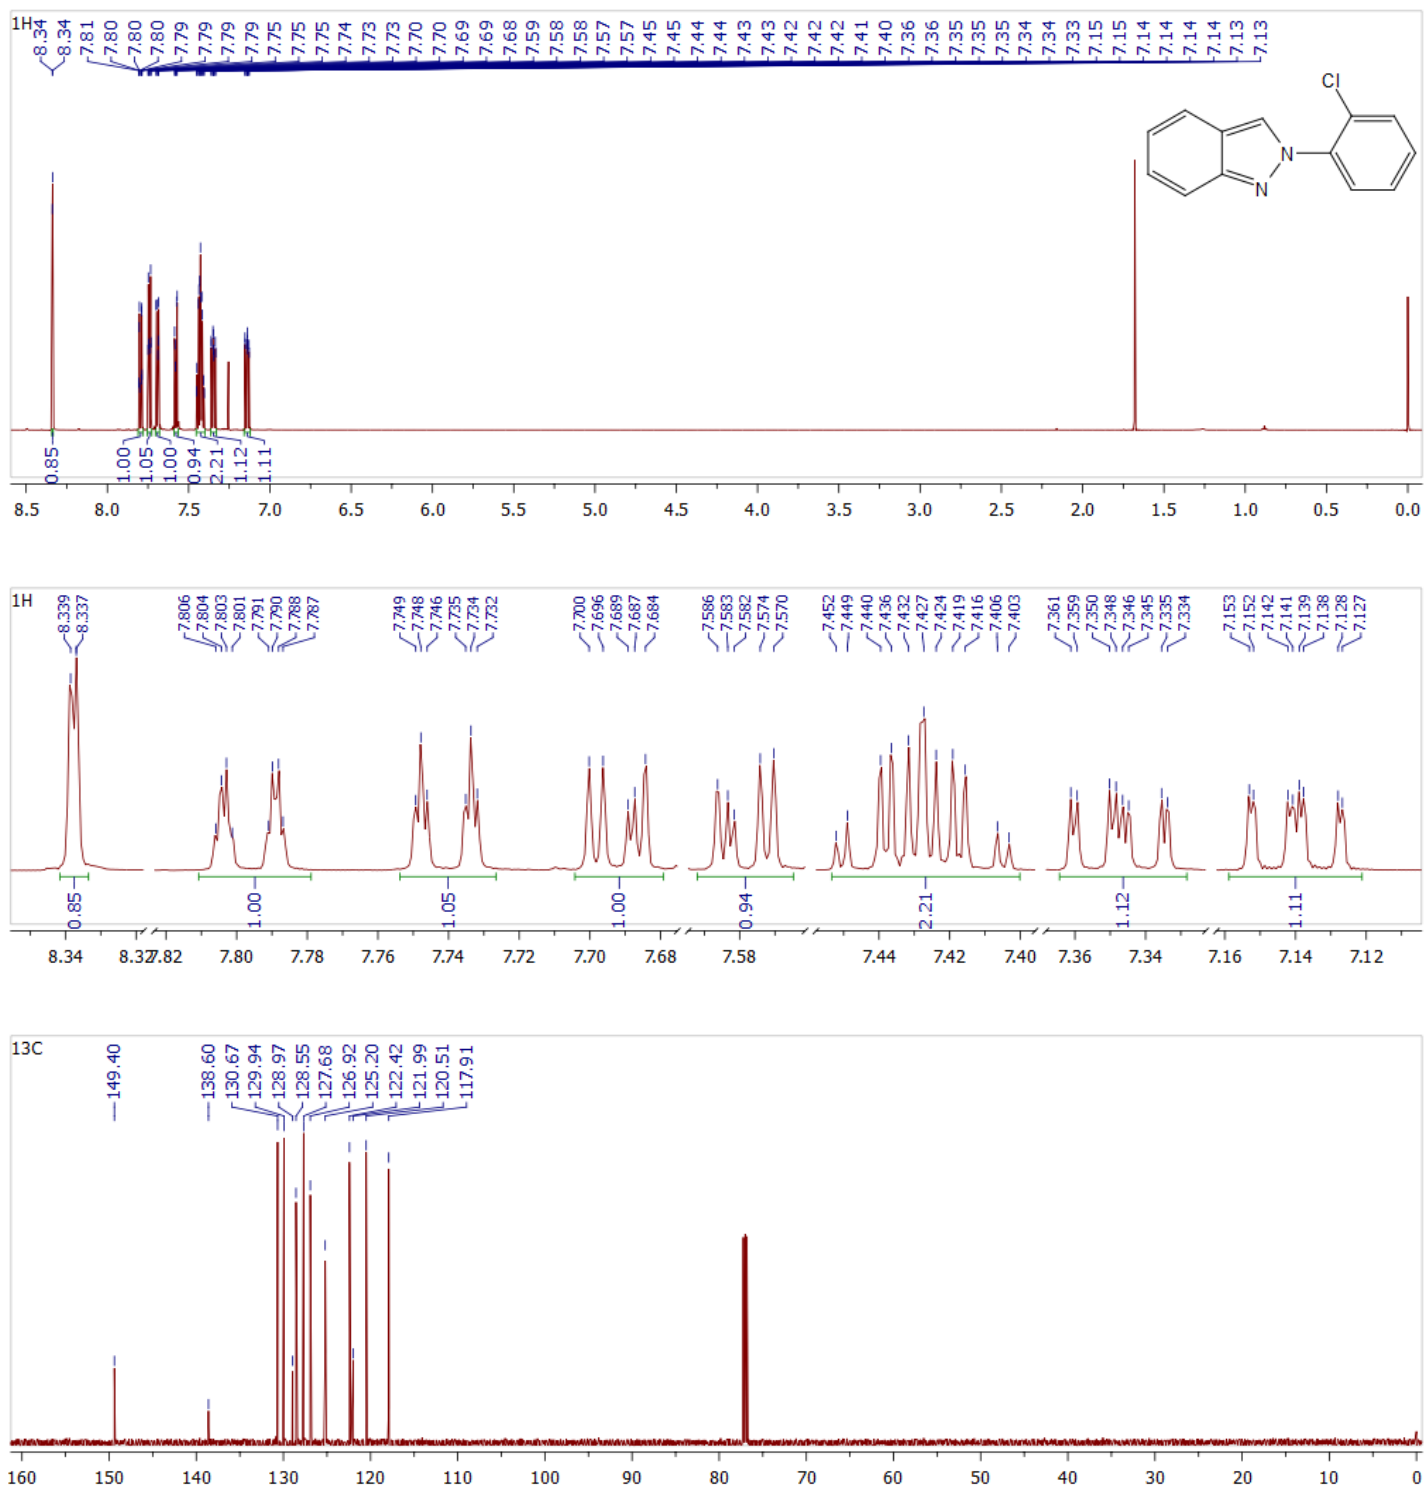

**Figure S16.** <sup>1</sup>H NMR (600 MHz, CDCl<sub>3</sub>) and <sup>13</sup>C NMR (151 MHz, CDCl<sub>3</sub>) for 2-(2-chlorophenyl)-2H-indazole (**16**).

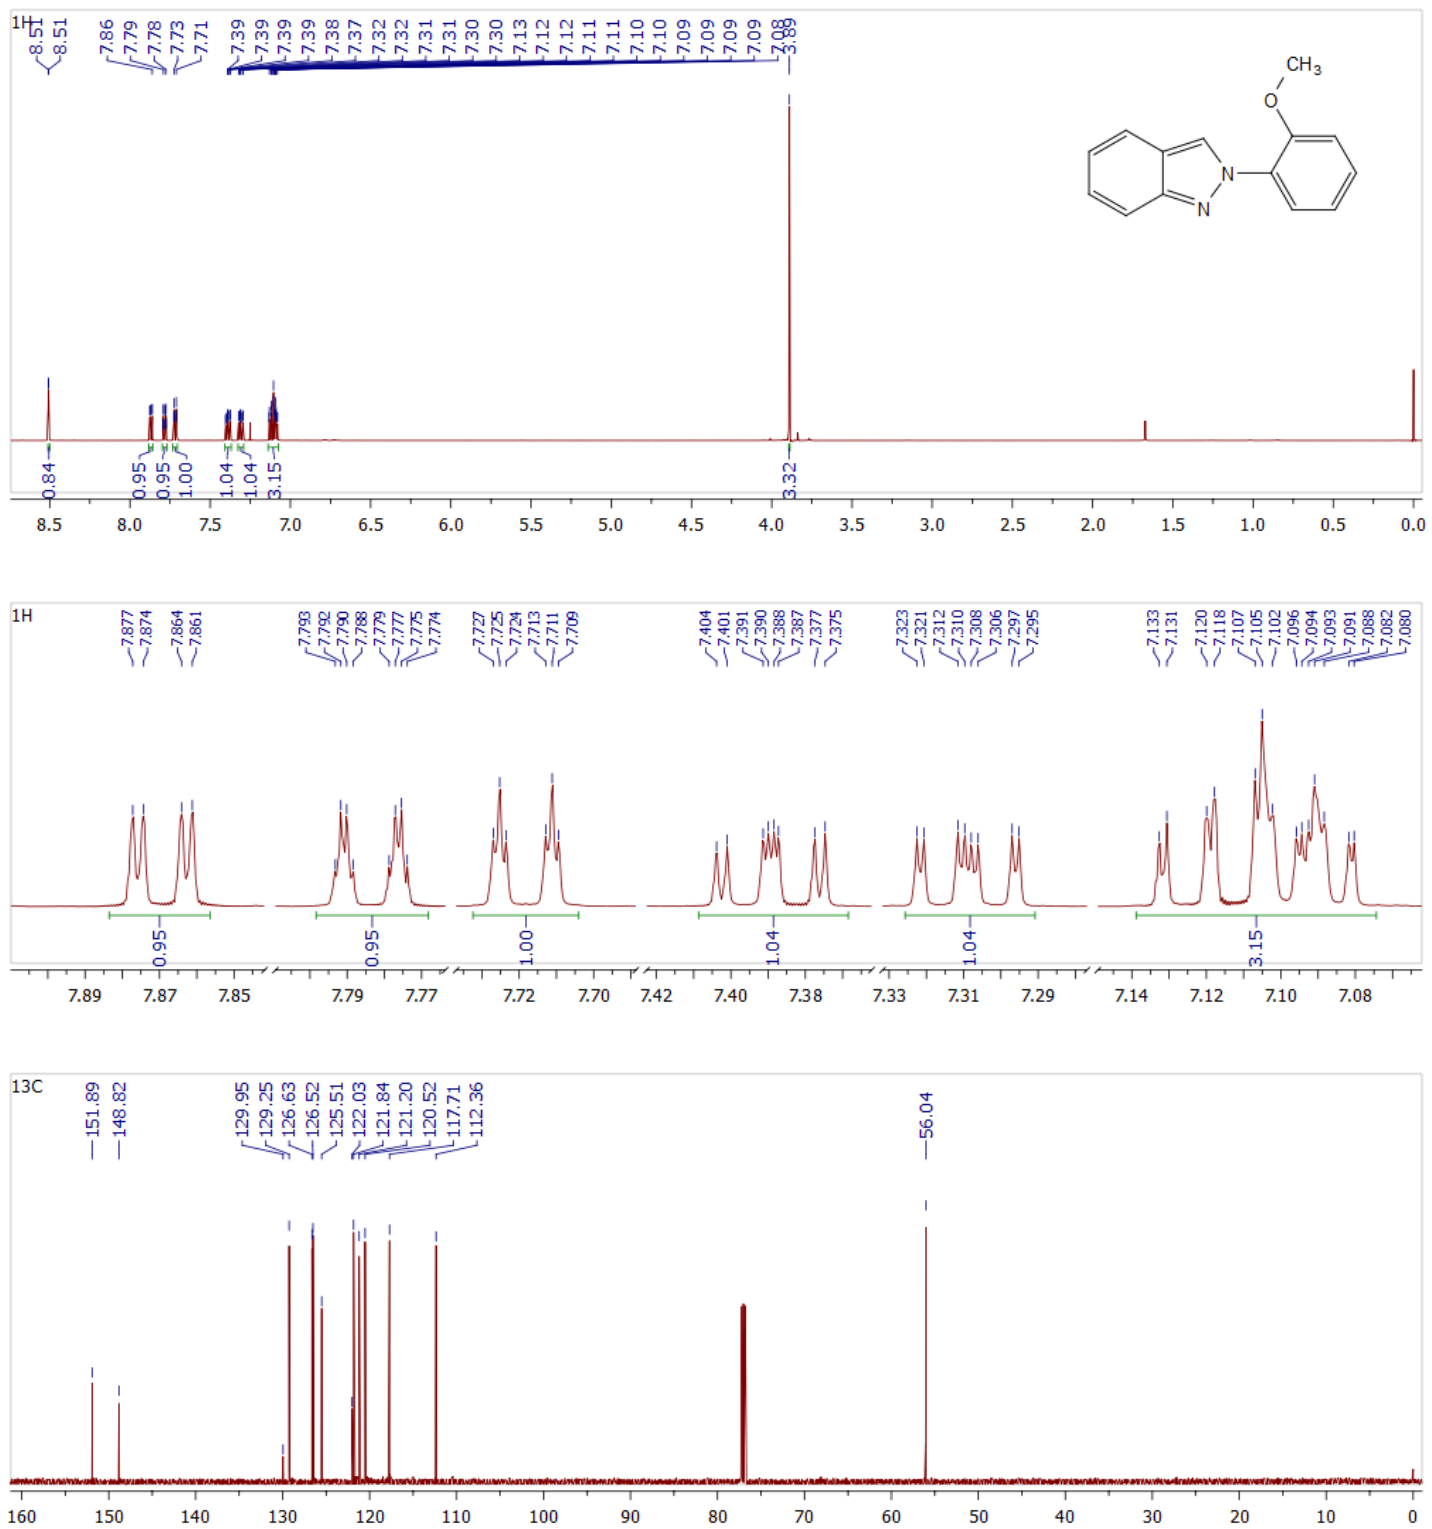

**Figure S17.** <sup>1</sup>H NMR (600 MHz, CDCl<sub>3</sub>) and <sup>13</sup>C NMR (151 MHz, CDCl<sub>3</sub>) for 2-(2-methoxyphenyl)-2H-indazole (**17**).

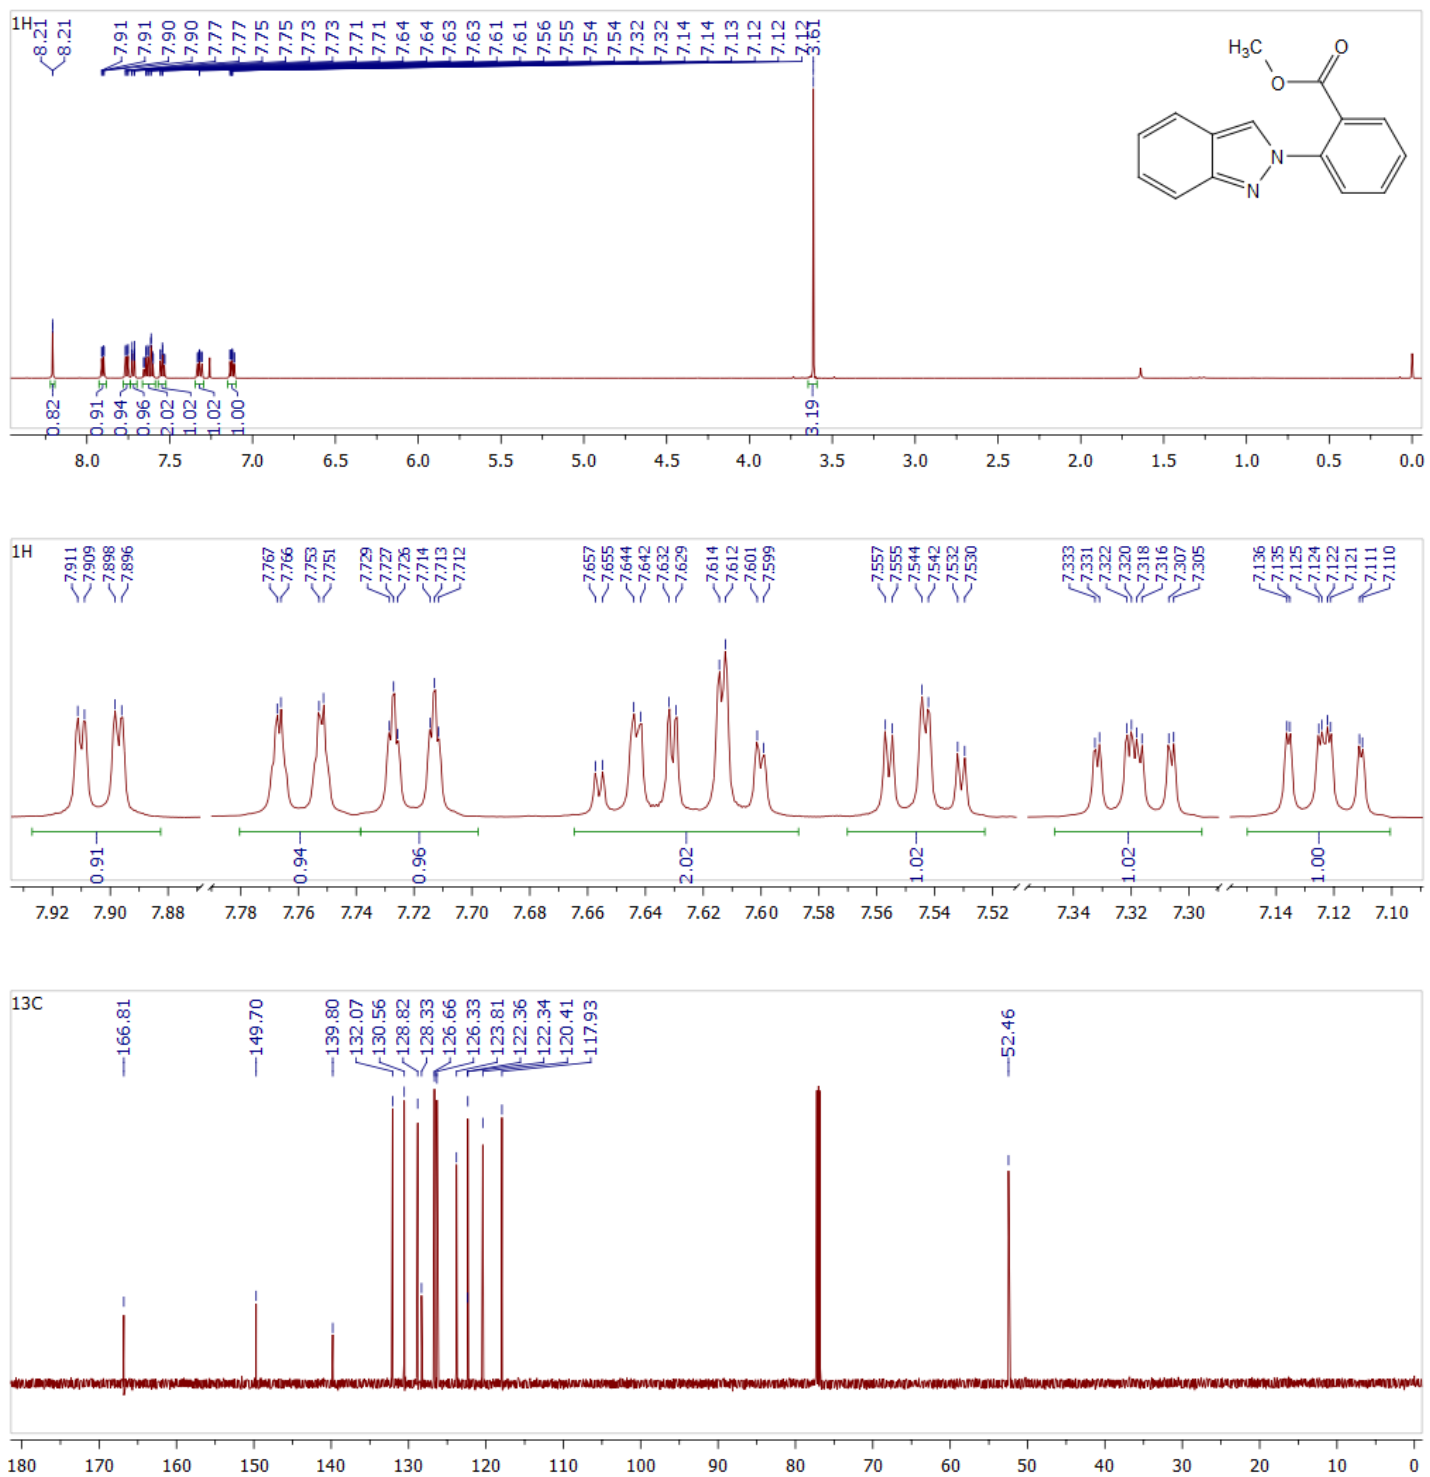

**Figure S18.** <sup>1</sup>H NMR (600 MHz, CDCl<sub>3</sub>) and <sup>13</sup>C NMR (151 MHz, CDCl<sub>3</sub>) for methyl 2-(2H-indazol-2-yl)benzoate (**18**).

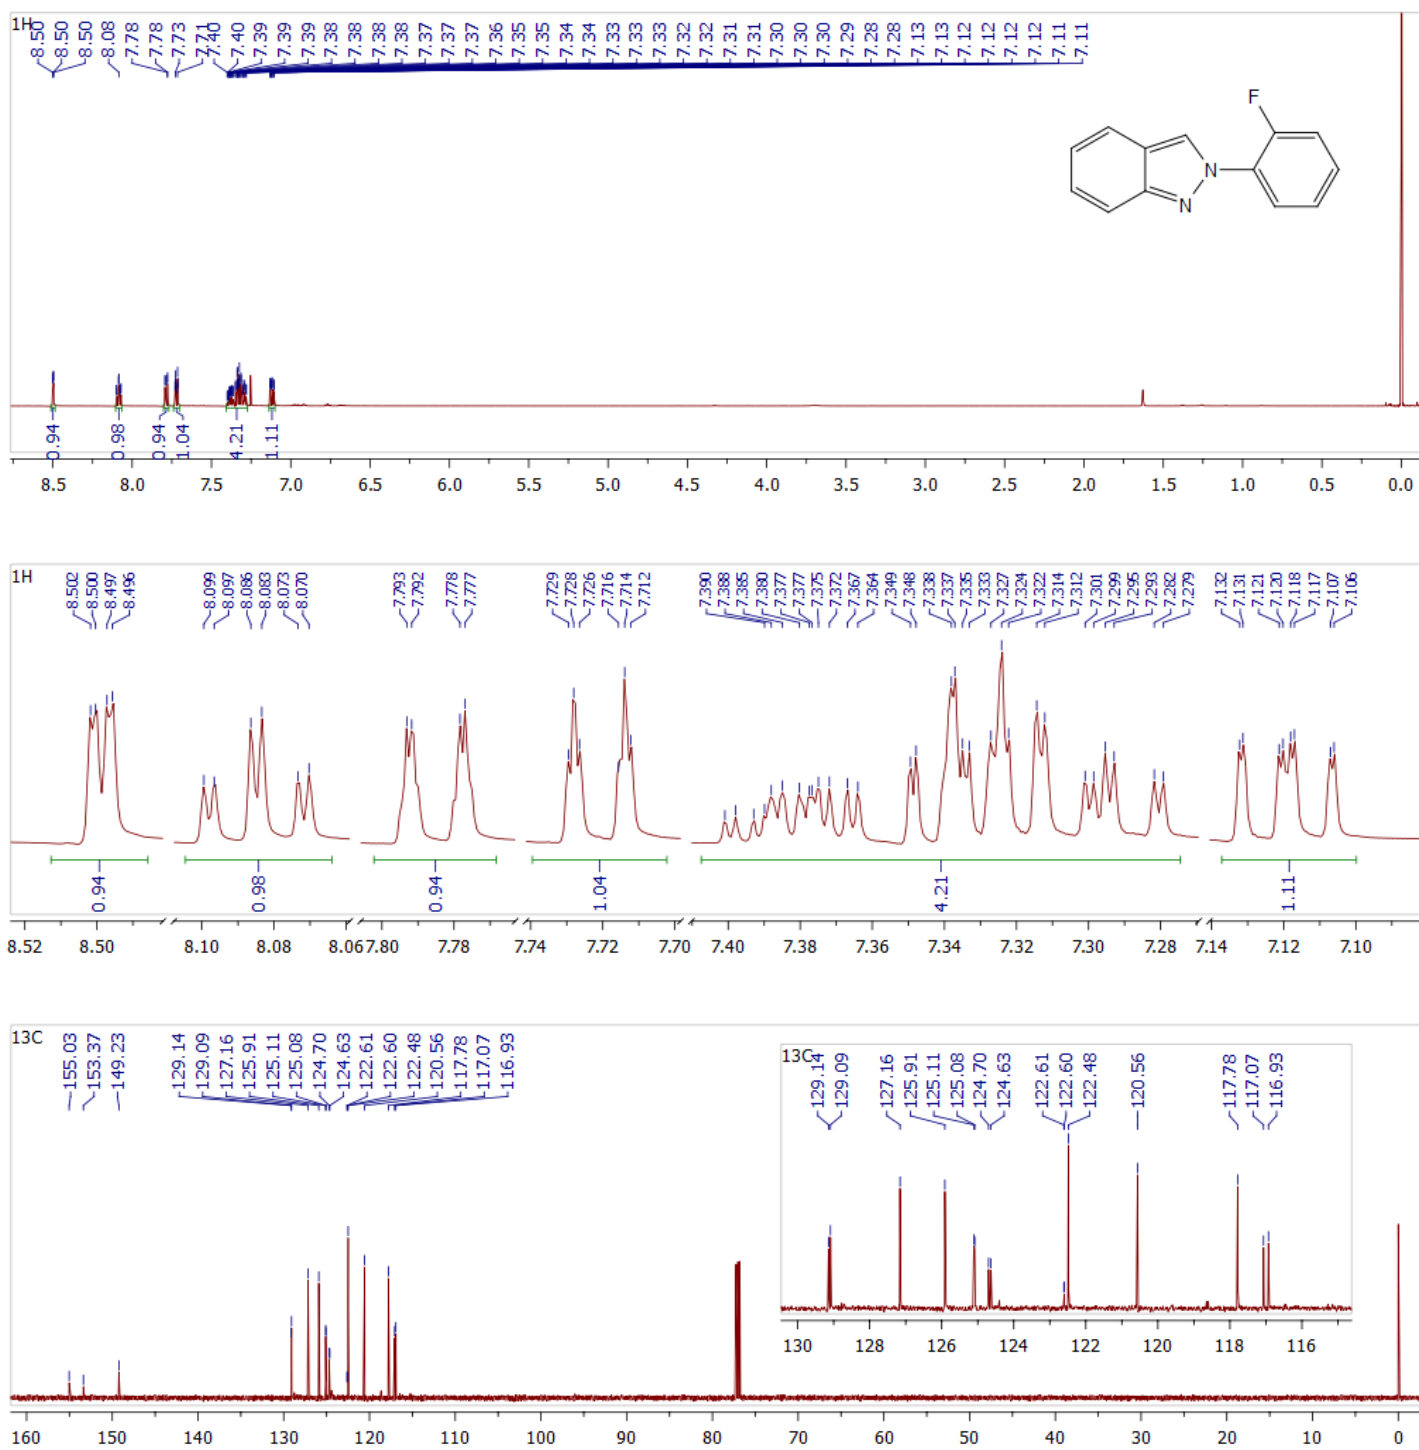

**Figure S19.** <sup>1</sup>H NMR (600 MHz, CDCl<sub>3</sub>) and <sup>13</sup>C NMR (151 MHz, CDCl<sub>3</sub>) for 2-(2-fluorophenyl)-2H-indazole (**19**).

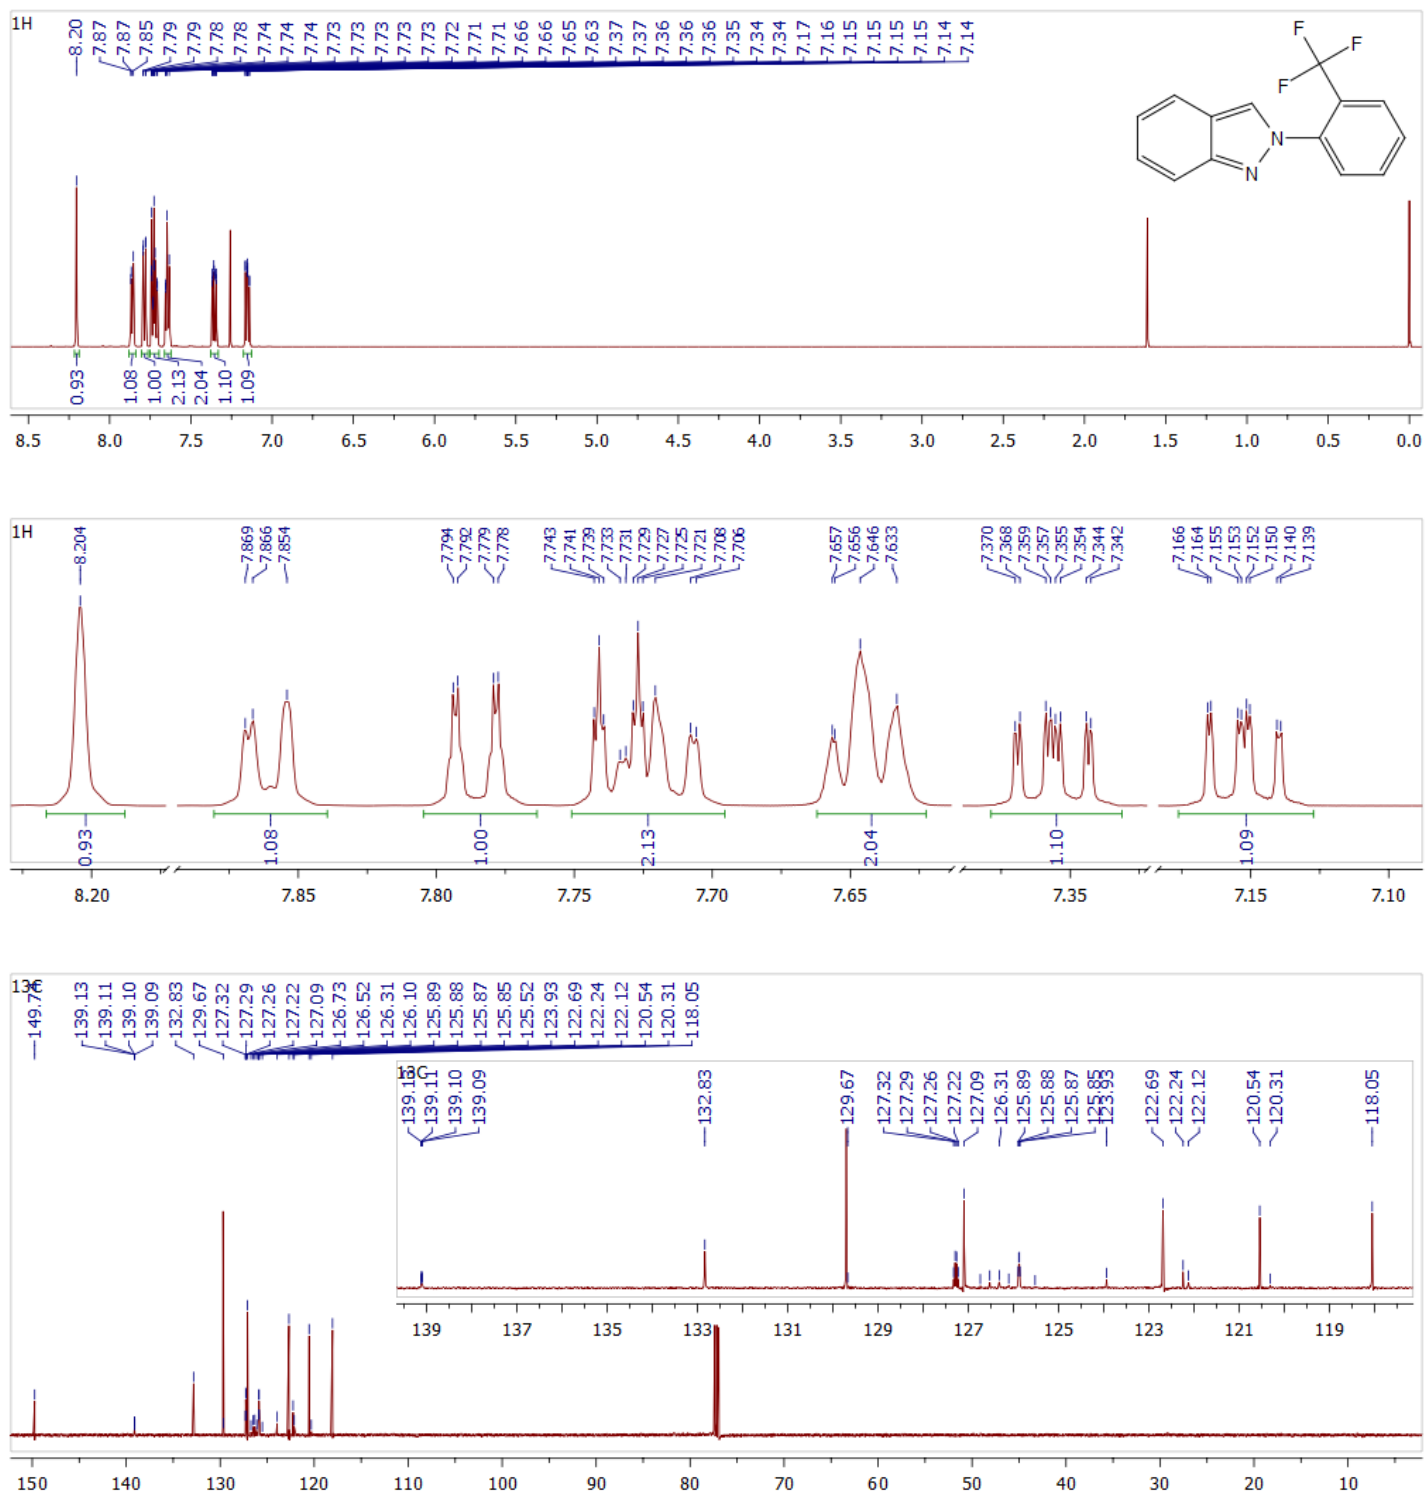

**Figure S20.** <sup>1</sup>H NMR (600 MHz, CDCl<sub>3</sub>) and <sup>13</sup>C NMR (151 MHz, CDCl<sub>3</sub>) for 2-[2-(trifluoromethyl)phenyl]-2H-indazole (20).

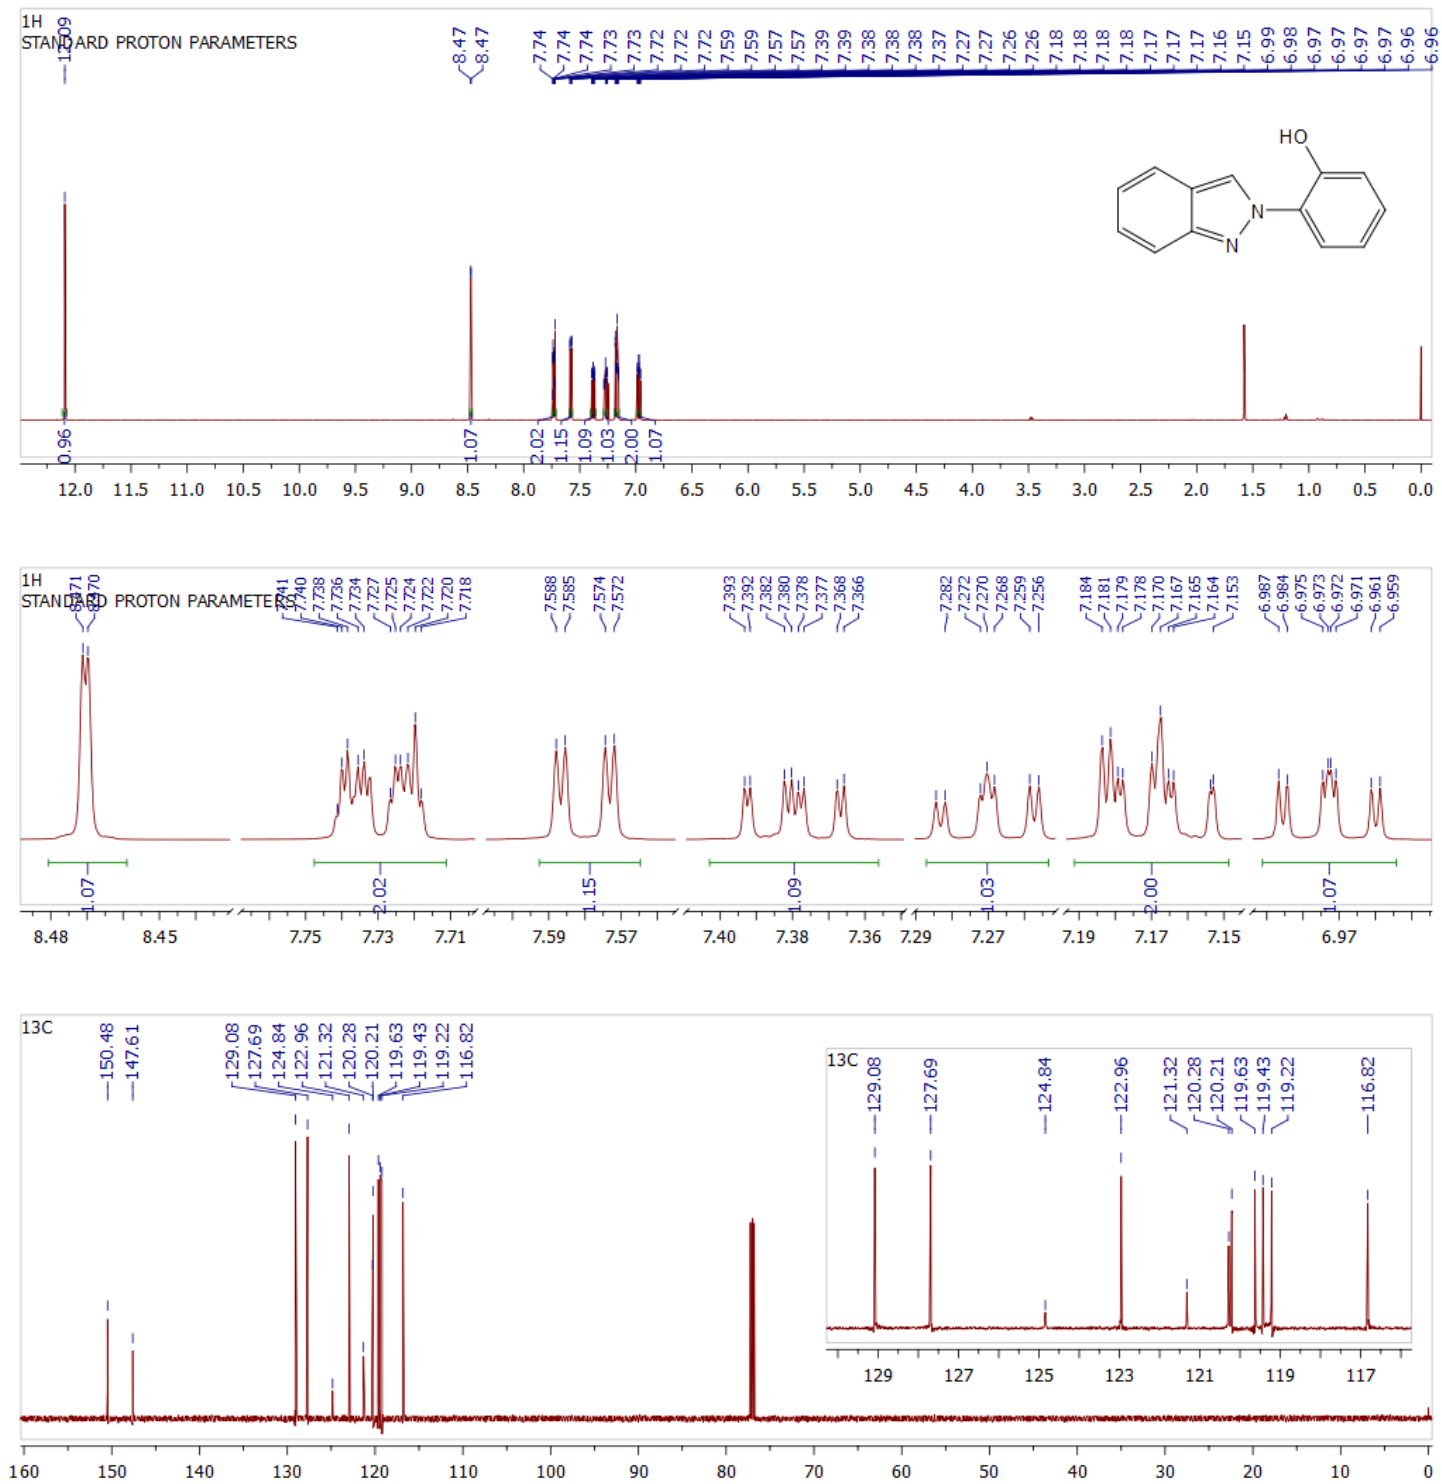

**Figure S21.** <sup>1</sup>H NMR (600 MHz, CDCl<sub>3</sub>) and <sup>13</sup>C NMR (151 MHz, CDCl<sub>3</sub>) for 2-(2*H*-indazol-2-yl)phenol (**21**).

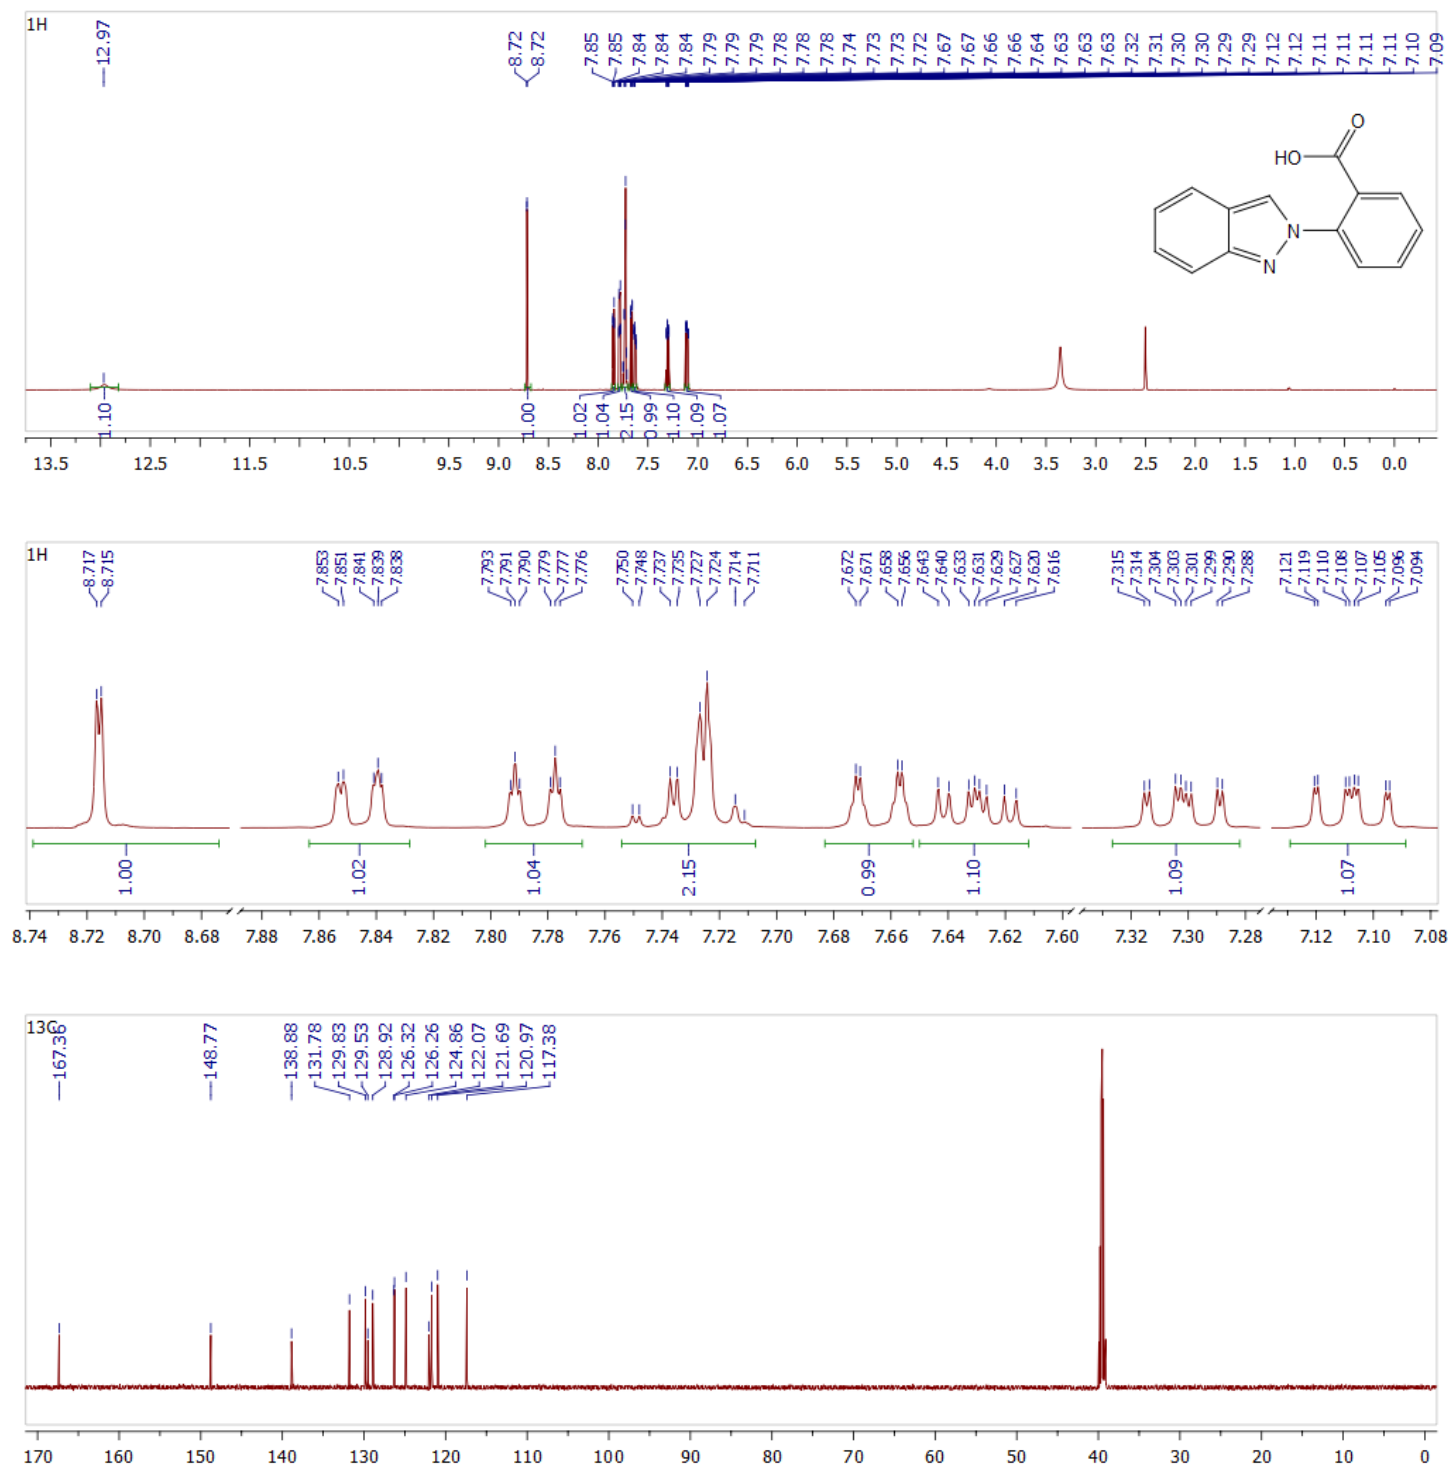

**Figure S22.** <sup>1</sup>H NMR (600 MHz, DMSO-*d*<sub>6</sub>) and <sup>13</sup>C NMR (151 MHz, DMSO-*d*<sub>6</sub>) for 2-(2*H*-indazol-2-yl)benzoic acid (**22**).

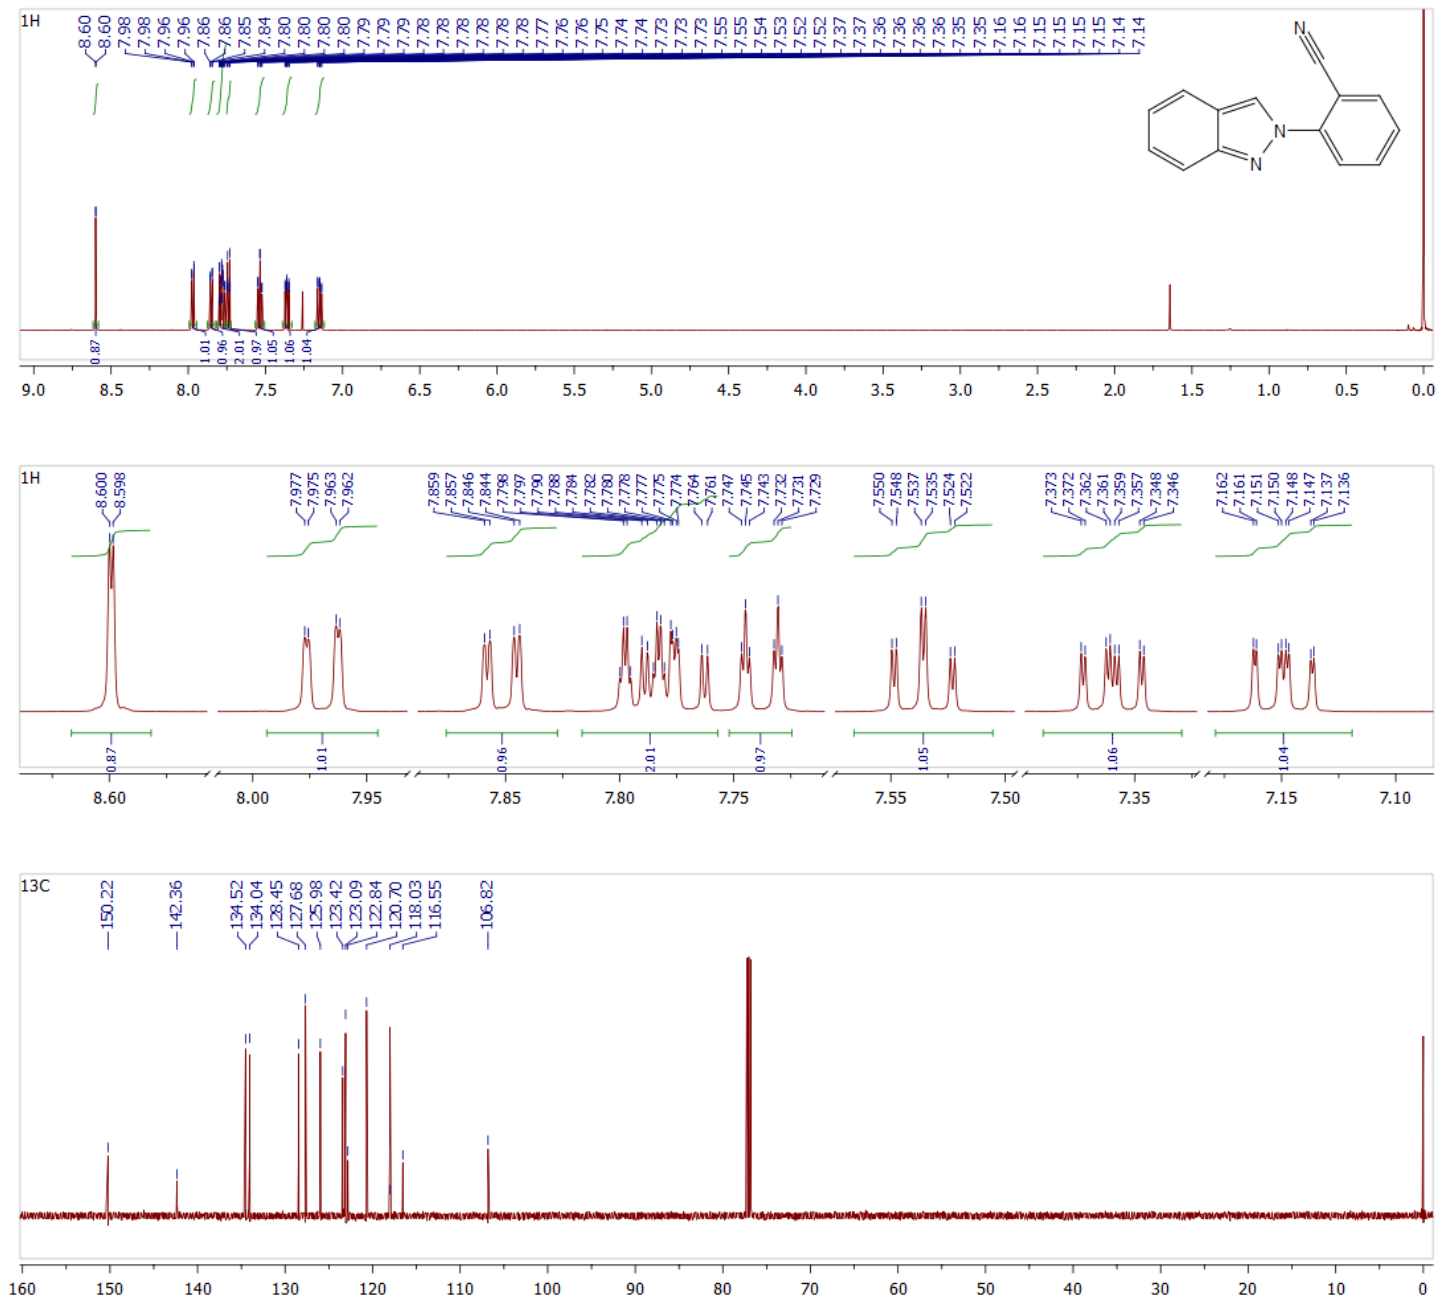

**Figure S23.** <sup>1</sup>H NMR (600 MHz, CDCl<sub>3</sub>) and <sup>13</sup>C NMR (151 MHz, CDCl<sub>3</sub>) for 2-(2*H*-indazol-2-yl)benzotrile (**18a**).
